# Supplementary material for: Photo- and pH-responsive giant vesicles: harnessing the properties of surface-active ionic liquids in designing dual-responsive catanionic vesicles
Source: Royal Society of Chemistry journal article supplement (doi:10.1039/d4nj03815k), 2024-01-01
Supplement: d4nj03815k2.xlsx [file d4nj03815k2.xlsx]

## Sheet: SANS
									Before Irradiation				After Irradiation
Ratio	0.2				0.3				0.5				0.5
	Q value	Intensity	Fitting	Error	Q value	Intensity	Fitting	Error	Q value	Intensity	Fitting	Error	Q value	Intensity	Fitting	Error
	0.01638	2.69894	3.141	0.02545	0.01638	3.8198	3.942	0.0276	0.01638	4.10772	3.634	0.02676	0.01638	8.46046	7.294	0.05071
	0.01827	2.15552	2.389	0.02326	0.01827	3.05378	3.084	0.0253	0.01827	3.25965	3.046	0.02515	0.01827	6.76666	6.317	0.04788
	0.02016	1.75768	1.864	0.0211	0.02016	2.49299	2.457	0.02302	0.02016	2.71546	2.49	0.02308	0.02016	5.52654	5.438	0.04501
	0.02204	1.45914	1.433	0.01939	0.02204	2.07215	2.04	0.0215	0.02204	2.12088	2.023	0.0214	0.02204	4.5959	4.592	0.04201
	0.02393	1.22719	1.157	0.01783	0.02393	1.74513	1.706	0.01989	0.02393	1.8322	1.683	0.01977	0.02393	3.87272	3.976	0.03915
	0.02582	1.04436	0.9467	0.01675	0.02582	1.48734	1.444	0.01873	0.02582	1.61192	1.444	0.0187	0.02582	3.30259	3.454	0.03694
	0.02771	0.89772	0.8102	0.0154	0.02771	1.28054	1.273	0.0174	0.02771	1.42757	1.327	0.01758	0.02771	2.84525	2.999	0.03452
	0.0296	0.77834	0.6849	0.01459	0.0296	1.11216	1.13	0.01661	0.0296	1.26716	1.156	0.01669	0.0296	2.47283	2.705	0.03278
	0.03149	0.67988	0.5532	0.01381	0.03149	0.97325	0.9693	0.01579	0.03149	1.1253	1.007	0.01593	0.03149	2.16559	2.411	0.031
	0.03338	0.59774	0.4939	0.01327	0.03338	0.85734	0.8526	0.01506	0.03338	0.99937	0.925	0.01537	0.03338	1.90919	2.16	0.02973
	0.03526	0.52887	0.4846	0.01283	0.03526	0.7601	0.7756	0.01435	0.03526	0.88846	0.8517	0.01469	0.03526	1.6941	1.936	0.02835
	0.03715	0.46997	0.4141	0.01254	0.03715	0.67693	0.6544	0.01384	0.03715	0.79031	0.7433	0.01425	0.03715	1.51008	1.728	0.02723
	0.03904	0.41949	0.3911	0.01214	0.03904	0.60561	0.6205	0.01342	0.03904	0.70455	0.7074	0.01384	0.03904	1.35229	1.558	0.02613
	0.04093	0.37591	0.3509	0.01174	0.04093	0.54402	0.5464	0.01287	0.04093	0.63006	0.6372	0.01333	0.04093	1.21599	1.423	0.02511
	0.04281	0.33824	0.3119	0.01147	0.04281	0.49074	0.5106	0.01264	0.04281	0.56599	0.5831	0.01301	0.04281	1.09808	1.26	0.02404
	0.0447	0.30513	0.2731	0.01108	0.0447	0.44389	0.4607	0.01222	0.0447	0.51041	0.5322	0.0126	0.0447	0.99436	1.11	0.02314
	0.04659	0.27605	0.2514	0.01104	0.04659	0.40269	0.4014	0.01197	0.04659	0.46248	0.4856	0.01243	0.04659	0.90315	1.007	0.02256
	0.04848	0.25036	0.2143	0.01087	0.04848	0.36629	0.36	0.01178	0.04848	0.42103	0.4316	0.01218	0.04848	0.82255	0.8786	0.02175
	0.05036	0.2277	0.2132	0.0104	0.05036	0.33414	0.3268	0.01116	0.05036	0.38518	0.4052	0.01162	0.05036	0.75134	0.829	0.02096
	0.05225	0.20741	0.1744	0.01042	0.05225	0.30533	0.2994	0.01124	0.05225	0.35363	0.3743	0.01168	0.05225	0.68751	0.7547	0.02044
	0.05413	0.18937	0.1712	0.01028	0.05413	0.27968	0.2709	0.01095	0.05413	0.32595	0.3462	0.0114	0.05413	0.63068	0.7012	0.02008
	0.05602	0.17311	0.1624	0.01015	0.05602	0.25653	0.2442	0.01072	0.05602	0.30119	0.3205	0.01118	0.05602	0.57935	0.6272	0.01955
	0.0579	0.15855	0.1552	0.00998	0.0579	0.23578	0.2377	0.01056	0.0579	0.27909	0.3084	0.011	0.0579	0.53333	0.581	0.01898
	0.05979	0.14534	0.1366	0.00972	0.05979	0.21693	0.2088	0.01024	0.05979	0.25903	0.305	0.01086	0.05979	0.49152	0.5267	0.01868
	0.06167	0.13345	0.1081	0.00989	0.06167	0.19994	0.1833	0.01042	0.06167	0.24089	0.2586	0.0109	0.06167	0.45381	0.4723	0.0184
	0.06356	0.12262	0.1061	0.00964	0.06356	0.18442	0.181	0.01018	0.06356	0.22425	0.2499	0.01062	0.06356	0.41937	0.4243	0.01799
	0.06544	0.11282	0.1087	0.00964	0.06544	0.17037	0.1771	0.01014	0.06544	0.20907	0.2394	0.01054	0.06544	0.38815	0.3998	0.01785
	0.06732	0.1039	0.1175	0.00959	0.06732	0.15754	0.1594	0.0099	0.06732	0.19514	0.2383	0.01043	0.06732	0.35965	0.358	0.01735
	0.06921	0.09571	0.068	0.00939	0.06921	0.14575	0.13	0.00986	0.06921	0.18225	0.198	0.01031	0.06921	0.33343	0.3138	0.01711
	0.07109	0.08827	0.09089	0.00938	0.07109	0.135	0.1275	0.00967	0.07109	0.17045	0.1968	0.01014	0.07109	0.30952	0.2933	0.01684
	0.07297	0.08145	0.08317	0.00938	0.07297	0.12514	0.1167	0.00964	0.07297	0.15958	0.1901	0.01015	0.07297	0.28757	0.2672	0.01656
	0.07485	0.0752	0.05312	0.00934	0.07485	0.11607	0.1013	0.00971	0.07485	0.14955	0.1645	0.01013	0.07485	0.26737	0.2318	0.01631
	0.07673	0.06946	0.06719	0.00907	0.07673	0.10772	0.1061	0.00938	0.07673	0.14029	0.1676	0.00981	0.07673	0.24876	0.2169	0.01593
	0.07862	0.06416	0.06097	0.00922	0.07862	0.09998	0.09294	0.00947	0.07862	0.13169	0.1595	0.00993	0.07862	0.2315	0.2149	0.01615
	0.0805	0.05931	0.03919	0.00919	0.0805	0.09288	0.07029	0.00944	0.0805	0.12377	0.1327	0.00988	0.0805	0.21564	0.1868	0.01604
	0.08238	0.05484	0.06121	0.00924	0.08238	0.08632	0.07769	0.00938	0.08238	0.11644	0.1237	0.0097	0.08238	0.20097	0.1837	0.0156
	0.08426	0.05072	0.04179	0.00909	0.08426	0.08024	0.07551	0.00936	0.08426	0.10963	0.1277	0.00973	0.08426	0.18739	0.1603	0.01555
	0.08614	0.04692	0.04694	0.00908	0.08614	0.07462	0.06349	0.00922	0.08614	0.1033	0.1069	0.00953	0.08614	0.1748	0.1407	0.01537
	0.08801	0.04343	0.04727	0.00884	0.08801	0.06943	0.08111	0.00912	0.08801	0.09743	0.1284	0.00946	0.08801	0.16318	0.1502	0.01527
	0.08989	0.04019	0.03106	0.00893	0.08989	0.0646	0.06541	0.00921	0.08989	0.09192	0.1101	0.00953	0.08989	0.15233	0.1297	0.01539
	0.09177	0.03719	0.03259	0.00884	0.09177	0.06011	0.06189	0.00909	0.09177	0.08677	0.09259	0.0093	0.09177	0.14224	0.1016	0.01528
	0.09365	0.03442	0.03571	0.00889	0.09365	0.05594	0.06852	0.00916	0.09365	0.08195	0.0971	0.00936	0.09365	0.13287	0.1251	0.01511
	0.09552	0.03187	0.03852	0.00883	0.09552	0.05208	0.0515	0.00895	0.09552	0.07746	0.07234	0.0091	0.09552	0.12418	0.08337	0.01504
	0.0974	0.0295	0.0425	0.00868	0.0974	0.04847	0.0523	0.00877	0.0974	0.07323	0.07953	0.00897	0.0974	0.11606	0.08462	0.01464
	0.09928	0.02731	0.04104	0.00893	0.09928	0.04512	0.04005	0.00894	0.09928	0.06925	0.07111	0.00916	0.09928	0.10848	0.09721	0.01505
	0.1011	0.02534	0.03193	0.00884	0.1011	0.04209	0.04323	0.00894	0.1011	0.06563	0.07063	0.00914	0.1011	0.10165	0.0956	0.01485
	0.103	0.02344	0.03065	0.00865	0.103	0.03915	0.0381	0.00872	0.103	0.06207	0.077	0.00902	0.103	0.09498	0.0841	0.01476
	0.1049	0.02168	0.02784	0.00886	0.1049	0.03641	0.03286	0.00891	0.1049	0.05873	0.0632	0.00913	0.1049	0.08878	0.08672	0.01457
	0.1068	0.02005	0.01626	0.0087	0.1068	0.03387	0.03851	0.0089	0.1068	0.05559	0.05496	0.00901	0.1068	0.08299	0.05527	0.01484
	0.1086	0.01863	0.02102	0.00871	0.1086	0.03162	0.03014	0.0088	0.1086	0.05278	0.05025	0.00894	0.1086	0.07787	0.07581	0.01471
	0.1105	0.01723	0.02027	0.00857	0.1105	0.0294	0.03639	0.00871	0.1105	0.04998	0.05034	0.00881	0.1105	0.07282	0.07369	0.01453
	0.1124	0.01595	0.02406	0.00868	0.1124	0.02734	0.02372	0.00869	0.1124	0.04734	0.05162	0.0089	0.1124	0.06811	0.05608	0.01447
	0.1143	0.01476	0.01261	0.00883	0.1143	0.02542	0.01028	0.00883	0.1143	0.04486	0.03711	0.00902	0.1143	0.06372	0.03935	0.01427
	0.1161	0.01372	0.02096	0.00863	0.1161	0.02373	0.03109	0.00872	0.1161	0.04263	0.0449	0.00882	0.1161	0.05983	0.04087	0.0143
	0.118	0.01271	0.01485	0.00863	0.118	0.02206	0.0304	0.00877	0.118	0.04041	0.03323	0.00878	0.118	0.056	0.03187	0.01431
	0.1199	0.01177	0.01154	0.00857	0.1199	0.02051	0.01266	0.00859	0.1199	0.03832	0.04369	0.00883	0.1199	0.05243	0.06629	0.01426
	0.1217	0.01096	0.00453	0.00866	0.1217	0.01914	0.01402	0.00875	0.1217	0.03644	0.03293	0.00888	0.1217	0.04927	0.06671	0.01458
	0.1236	0.01016	0.01449	0.00864	0.1236	0.01779	0.02107	0.00871	0.1236	0.03456	0.03745	0.00883	0.1236	0.04615	0.04453	0.01431
	0.1255	0.00943	0.0059	0.00861	0.1255	0.01654	0.00825	0.00864	0.1255	0.03278	0.01704	0.0087	0.1255	0.04325	0.04982	0.01447
	0.1273	0.0088	0.00902	0.00843	0.1273	0.01544	0.02324	0.00856	0.1273	0.03119	0.02879	0.00859	0.1273	0.04068	0.06672	0.01431
	0.1292	0.00818	-0.00383	0.0086	0.1292	0.01436	0.01206	0.00874	0.1292	0.02959	0.01497	0.00875	0.1292	0.03815	0.03265	0.01424
	0.1311	0.00762	0.0139	0.00845	0.1311	0.01335	0.01266	0.00845	0.1311	0.02808	0.02935	0.00857	0.1311	0.0358	0.04879	0.01386
	0.1329	0.00713	0.02329	0.00861	0.1329	0.01247	0.00851	0.0085	0.1329	0.02673	0.02176	0.00859	0.1329	0.03372	0.04908	0.01409
	0.1348	0.00666	0.00865	0.00849	0.1348	0.01161	0.00515	0.00848	0.1348	0.02537	0.02772	0.00865	0.1348	0.03168	0.03363	0.01413
	0.1367	0.00623	0.0097	0.00849	0.1367	0.0108	0.01747	0.00857	0.1367	0.02408	0.02501	0.00862	0.1367	0.02979	0.00176	0.01434
	0.1385	0.00586	0.01434	0.00869	0.1385	0.0101	0.00681	0.00864	0.1385	0.02293	0.01657	0.00871	0.1385	0.02812	0.02636	0.01437
	0.1404	0.0055	0.02171	0.00845	0.1404	0.00941	0.0104	0.00837	0.1404	0.02177	0.02519	0.00848	0.1404	0.02648	0.04222	0.01407
	0.1423	0.00518	0.0004092	0.00837	0.1423	0.00878	0.00513	0.00842	0.1423	0.02067	0.0167	0.0085	0.1423	0.02496	0.03342	0.01403
	0.1441	0.0049	-0.0005529	0.00867	0.1441	0.00823	0.00222	0.0087	0.1441	0.01968	-0.00181	0.00866	0.1441	0.02362	0.02743	0.01425
	0.146	0.00464	0.0003655	0.00869	0.146	0.00769	-0.00262	0.00868	0.146	0.01869	-0.00604	0.00864	0.146	0.02232	0.03176	0.01439
	0.1478	0.00441	0.0008639	0.00861	0.1478	0.00722	0.00277	0.00864	0.1478	0.0178	0.00421	0.00864	0.1478	0.02117	0.01751	0.01437
	0.1497	0.0042	0.01429	0.00846	0.1497	0.00676	0.00643	0.00841	0.1497	0.01691	0.02279	0.00853	0.1497	0.02006	0.03642	0.01416
	0.1515	0.00402	0.00884	0.00854	0.1515	0.00636	0.00882	0.00855	0.1515	0.01611	0.01024	0.00855	0.1515	0.01908	0.04951	0.01415
	0.1534	0.00386	0.01246	0.00853	0.1534	0.00598	0.01091	0.00854	0.1534	0.01531	0.00717	0.00849	0.1534	0.01813	0.02221	0.01405
	0.1552	0.00371	0.00766	0.00834	0.1552	0.00564	0.000961	0.0083	0.1552	0.01459	0.01754	0.00843	0.1552	0.01729	0.03265	0.01371
	0.1571	0.00358	0.0195	0.00846	0.1571	0.00532	0.01317	0.00842	0.1571	0.01386	0.02869	0.00853	0.1571	0.01649	0.02121	0.01427
	0.159	0.00347	-0.0034	0.00844	0.159	0.00503	-0.00513	0.00844	0.159	0.01317	0.00342	0.0085	0.159	0.01575	0.03164	0.01399
	0.1608	0.00338	0.01702	0.00849	0.1608	0.00478	0.01574	0.0085	0.1608	0.01256	0.01535	0.00848	0.1608	0.01511	0.02919	0.0142
	0.1627	0.00329	-0.00422	0.00849	0.1627	0.00454	-0.00137	0.00853	0.1627	0.01194	0.00581	0.00858	0.1627	0.01449	0.00735	0.01432
	0.1645	0.00322	0.0001198	0.00865	0.1645	0.00433	-0.01097	0.00858	0.1645	0.01138	-0.00559	0.00861	0.1645	0.01396	0.0007916	0.01419
	0.1664	0.00316	0.01612	0.00827	0.1664	0.00414	0.01972	0.00831	0.1664	0.01083	0.02127	0.00831	0.1664	0.01345	0.02028	0.01383
	0.1682	0.00312	-0.0011	0.0084	0.1682	0.00397	-5.335e-05	0.00842	0.1682	0.01033	0.01352	0.00852	0.1682	0.01301	0.04135	0.01409
	0.1701	0.00308	0.00622	0.00842	0.1701	0.00381	0.00645	0.00843	0.1701	0.00983	0.01067	0.00845	0.1701	0.01259	0.02359	0.01409
	0.1719	0.00305	-0.00725	0.00853	0.1719	0.00368	-0.0004717	0.0086	0.1719	0.00938	-0.00586	0.00854	0.1719	0.01223	0.02881	0.01404
	0.1738	0.00303	0.00499	0.00841	0.1738	0.00356	-0.0007661	0.00838	0.1738	0.00893	0.00416	0.00841	0.1738	0.01189	0.05812	0.01391
	0.1756	0.00301	-0.0004893	0.00848	0.1756	0.00346	0.0001357	0.0085	0.1756	0.00852	0.00452	0.00852	0.1756	0.0116	0.01741	0.01407
	0.1775	0.003	-0.00715	0.00837	0.1775	0.00336	-0.00919	0.00837	0.1775	0.00812	-0.00395	0.0084	0.1775	0.01133	0.00527	0.014
	0.1793	0.003	-0.01261	0.00845	0.1793	0.00329	-0.00919	0.00849	0.1793	0.00775	-0.00857	0.00848	0.1793	0.0111	0.01642	0.01388
	0.1811	0.003	0.00621	0.00852	0.1811	0.00322	-0.00112	0.00847	0.1811	0.00741	-0.00145	0.00845	0.1811	0.01091	0.01763	0.0141
	0.183	0.00301	6.835e-05	0.00846	0.183	0.00316	-0.00269	0.00845	0.183	0.00706	-0.00202	0.00844	0.183	0.01072	0.0121	0.0141
	0.1848	0.00302	0.00423	0.00842	0.1848	0.00312	0.00906	0.00847	0.1848	0.00675	0.00409	0.00842	0.1848	0.01057	0.01305	0.01379
	0.1867	0.00303	-0.0004823	0.00826	0.1867	0.00308	-0.0006605	0.00828	0.1867	0.00645	0.00133	0.00828	0.1867	0.01044	0.04315	0.01359
	0.1885	0.00305	-0.00227	0.0084	0.1885	0.00305	-0.0009865	0.00842	0.1885	0.00617	0.00204	0.00843	0.1885	0.01033	0.01424	0.01417
	0.1903	0.00307	0.00466	0.00834	0.1903	0.00303	0.00615	0.00837	0.1903	0.00591	0.00425	0.00834	0.1903	0.01024	0.00761	0.01373
	0.1922	0.00309	0.00576	0.00836	0.1922	0.00301	0.00125	0.00834	0.1922	0.00565	0.00131	0.00833	0.1922	0.01016	0.036	0.01362
	0.194	0.00311	0.015	0.00838	0.194	0.003	0.00391	0.00831	0.194	0.00541	0.0086	0.00833	0.194	0.0101	0.01644	0.01398
	0.1958	0.00313	-0.01843	0.00836	0.1958	0.003	-0.00204	0.00851	0.1958	0.00519	-0.01133	0.00841	0.1958	0.01006	0.01787	0.01398
	0.1977	0.00316	0.0123	0.00824	0.1977	0.003	0.00666	0.00821	0.1977	0.00497	0.00283	0.00816	0.1977	0.01003	0.01123	0.01378
	0.1995	0.00318	0.00194	0.00827	0.1995	0.00301	0.00537	0.00832	0.1995	0.00477	0.00166	0.00827	0.1995	0.01001	0.02277	0.01378
	0.2013	0.0032	0.01012	0.0084	0.2013	0.00302	-0.00249	0.00831	0.2013	0.00459	-0.00283	0.0083	0.2013	0.01	0.02036	0.01375
	0.2032	0.00323	0.00649	0.00834	0.2032	0.00303	0.00154	0.00831	0.2032	0.0044	0.00245	0.00831	0.2032	0.01	0.00992	0.01373
	0.205	0.00326	0.00945	0.00825	0.205	0.00304	0.00256	0.00821	0.205	0.00424	0.00764	0.00824	0.205	0.01001	0.0224	0.01359
	0.2068	0.00328	-0.00486	0.00832	0.2068	0.00306	-0.00114	0.00837	0.2068	0.00408	-0.00486	0.00832	0.2068	0.01003	0.02559	0.01368
	0.2087	0.00331	-0.00611	0.00842	0.2087	0.00308	-0.00558	0.00844	0.2087	0.00393	-0.01098	0.00838	0.2087	0.01006	0.02388	0.01373
	0.2105	0.00333	-0.00343	0.00852	0.2105	0.00311	-0.00627	0.00851	0.2105	0.00379	-0.01108	0.00846	0.2105	0.01009	0.01459	0.01388
	0.2123	0.00335	-0.00293	0.00826	0.2123	0.00313	0.00312	0.00832	0.2123	0.00366	0.00111	0.00829	0.2123	0.01012	0.02033	0.01384
	0.2141	0.00337	0.00176	0.00817	0.2141	0.00315	-0.00683	0.0081	0.2141	0.00354	0.0033	0.00818	0.2141	0.01016	0.04183	0.01361
	0.216	0.0034	0.01111	0.00829	0.216	0.00318	0.01343	0.00833	0.216	0.00342	0.00708	0.00826	0.216	0.01021	0.01868	0.01371
	0.2178	0.00342	-0.00142	0.0084	0.2178	0.00321	0.00265	0.00845	0.2178	0.00331	0.00233	0.00843	0.2178	0.01025	0.00217	0.01427
	0.2196	0.00343	0.00544	0.00831	0.2196	0.00323	-0.00287	0.00825	0.2196	0.00321	-0.00751	0.0082	0.2196	0.0103	0.02821	0.01362
	0.2214	0.00345	-0.00305	0.0083	0.2214	0.00326	-0.01832	0.00818	0.2214	0.00312	-0.01001	0.00824	0.2214	0.01035	0.00316	0.01349
	0.2232	0.00347	0.00497	0.00811	0.2232	0.00329	0.00282	0.0081	0.2232	0.00303	0.0009317	0.00807	0.2232	0.01041	0.01333	0.01353
	0.2251	0.00348	0.00664	0.00819	0.2251	0.00331	5.85e-06	0.00815	0.2251	0.00295	0.00442	0.00817	0.2251	0.01046	0.01492	0.01352
	0.2269	0.0035	0.00672	0.0083	0.2269	0.00334	-0.00424	0.00822	0.2269	0.00287	-0.00539	0.0082	0.2269	0.01052	-0.01012	0.01357
	0.2287	0.00351	-0.00362	0.00828	0.2287	0.00337	-0.00791	0.00826	0.2287	0.0028	-0.0071	0.00825	0.2287	0.01057	0.00481	0.01358
	0.2305	0.00352	0.00869	0.00816	0.2305	0.00339	0.00555	0.00815	0.2305	0.00273	0.00327	0.00811	0.2305	0.01063	0.0139	0.01346
	0.2323	0.00353	-0.00468	0.00846	0.2323	0.00342	-0.01427	0.00839	0.2323	0.00267	-0.0193	0.00834	0.2323	0.01068	0.01672	0.01385
	0.2341	0.00354	0.00516	0.00835	0.2341	0.00344	-0.01012	0.00824	0.2341	0.00261	-0.00542	0.00827	0.2341	0.01073	0.000852	0.01358
	0.2359	0.00355	0.01098	0.0081	0.2359	0.00346	0.00573	0.00807	0.2359	0.00256	0.00583	0.00805	0.2359	0.01079	0.02257	0.01353
	0.2377	0.00355	-0.00774	0.00798	0.2377	0.00348	0.00596	0.00811	0.2377	0.00251	0.00159	0.00806	0.2377	0.01084	0.00317	0.01338
	0.2395	0.00355	-0.0013	0.00815	0.2395	0.0035	0.00573	0.00822	0.2395	0.00247	-0.00854	0.00809	0.2395	0.01089	0.00767	0.01345
	0.2414	0.00356	0.0051	0.00809	0.2414	0.00353	0.00183	0.00808	0.2414	0.00242	0.00343	0.00808	0.2414	0.01094	0.02598	0.01331
	0.2432	0.00356	0.00384	0.00825	0.2432	0.00354	-0.01426	0.00811	0.2432	0.00238	0.00635	0.00827	0.2432	0.01098	0.01219	0.01336
	0.245	0.00356	0.01638	0.00796	0.245	0.00356	0.01184	0.00793	0.245	0.00235	0.00441	0.00786	0.245	0.01102	0.01348	0.01339
	0.2468	0.00356	-0.00439	0.00807	0.2468	0.00358	0.0026	0.00815	0.2468	0.00232	0.00689	0.00817	0.2468	0.01107	0.01664	0.01346
	0.2486	0.00356	-0.00311	0.00829	0.2486	0.00359	-0.00683	0.00827	0.2486	0.00229	-0.01452	0.0082	0.2486	0.0111	0.01667	0.01355
	0.2504	0.00355	0.00591	0.00813	0.2504	0.0036	0.00597	0.00814	0.2504	0.00226	0.0008995	0.00809	0.2504	0.01114	0.01426	0.01336
	0.2522	0.00355	-0.00395	0.00825	0.2522	0.00361	-0.01242	0.00819	0.2522	0.00224	-0.01147	0.00818	0.2522	0.01118	0.01564	0.01329
	0.254	0.00354	0.00586	0.00794	0.254	0.00362	0.00257	0.00792	0.254	0.00221	0.00558	0.00793	0.254	0.01121	0.00586	0.01311
	0.2558	0.00354	0.00824	0.0081	0.2558	0.00363	-0.00482	0.008	0.2558	0.00219	-0.00582	0.00798	0.2558	0.01124	0.00602	0.01324
	0.2576	0.00353	0.00542	0.00803	0.2576	0.00364	-0.00471	0.00795	0.2576	0.00217	-0.00404	0.00795	0.2576	0.01126	0.01202	0.01315
	0.2594	0.00352	0.00506	0.00795	0.2594	0.00365	0.00314	0.00794	0.2594	0.00216	-0.0009306	0.00789	0.2594	0.01129	0.03241	0.01325

## Sheet: FTIR
	%T		%T		%T
Wavenumber (1/cm)	[C8Emorph][MO]	Wavenumber (1/cm)	GV	Wavenumber (1/cm)	[Ch][Ol]
408.909	50.9383	408.923	40.9237	403.136	98.6399
412.767	54.1002	416.638	41.4232	405.065	96.8227
416.624	21.6165	424.354	41.2324	406.994	98.1741
420.482	20.8239	432.069	40.2134	408.923	98.2342
424.34	30.4931	439.785	40.0399	410.851	96.009
428.197	58.8393	447.5	41.9698	412.78	93.9753
432.055	68.3364	455.216	43.8581	414.709	97.2672
435.912	69.2965	462.931	45.6519	416.638	98.7322
439.77	67.9619	470.647	47.4385	418.567	91.0742
443.628	74.7127	478.362	49.4341	420.496	89.6448
447.485	87.6781	486.078	52.0107	422.425	95.074
451.343	84.8399	493.793	55.8882	424.354	96.5854
455.201	81.4513	501.509	59.4073	426.282	93.0647
459.058	79.7641	509.224	62.3622	428.211	94.0788
462.916	83.1994	516.94	65.5579	430.14	90.9684
466.773	84.5035	524.655	69.224	432.069	91.4797
470.631	80.4608	532.371	72.6117	433.998	94.47
474.489	84.757	540.086	74.9018	435.927	97.1482
478.346	81.6535	547.802	76.1296	437.856	94.1815
482.204	84.394	555.517	76.8675	439.785	93.1223
486.062	89.463	563.233	77.3812	441.714	94.1251
489.919	88.8275	570.948	77.5487	443.642	90.8001
493.777	87.3653	578.664	77.4716	445.571	89.5586
497.635	90.0848	586.38	77.5771	447.5	88.5372
501.492	87.3846	594.095	78.1578	449.429	88.2576
505.35	86.8066	601.811	79.0921	451.358	88.2948
509.207	92.7717	609.526	79.9233	453.287	86.0472
513.065	96.8245	617.242	80.0795	455.216	88.2006
516.923	92.2069	624.957	79.2831	457.145	89.2629
520.78	92.0376	632.673	77.8183	459.073	86.9533
524.638	91.6042	640.388	76.2256	461.002	87.8655
528.496	89.6149	648.104	74.7717	462.931	89.0373
532.353	87.1215	655.819	73.2938	464.86	89.9078
536.211	86.1386	663.535	71.4817	466.789	90.6371
540.068	86.423	671.25	69.2464	468.718	89.4419
543.926	86.181	678.966	66.8399	470.647	88.1847
547.784	79.2099	686.681	64.6686	472.576	86.3444
551.641	68.8055	694.397	62.9305	474.504	85.6879
555.499	67.6847	702.112	61.4295	476.433	86.0355
559.357	75.3886	709.828	59.8134	478.362	86.1466
563.214	74.3021	717.543	58.0136	480.291	85.9852
567.072	60.4971	725.259	56.4015	482.22	85.0527
570.93	53.8161	732.974	55.4799	484.149	84.3798
574.787	68.3726	740.69	55.4315	486.078	86.5627
578.645	80.6112	748.405	55.952	488.007	86.5945
582.502	84.4895	756.121	56.5193	489.936	86.8015
586.36	82.9372	763.836	56.827	491.864	87.2018
590.218	80.8948	771.552	56.9833	493.793	86.081
594.075	81.4686	779.268	57.3045	495.722	85.5513
597.933	82.7185	786.983	57.9254	497.651	85.499
601.791	81.9065	794.699	58.5895	499.58	86.2143
605.648	79.9655	802.414	58.848	501.509	86.5164
609.506	76.2027	810.13	58.4843	503.438	85.6143
613.363	66.2594	817.845	57.7188	505.367	85.4694
617.221	53.5011	825.561	56.9811	507.295	85.6465
621.079	55.2204	833.276	56.4828	509.224	85.3826
624.936	59.9729	840.992	56.0468	511.153	84.5603
628.794	59.0242	848.707	55.35	513.082	83.2145
632.652	68.9995	856.423	54.2768	515.011	82.8092
636.509	76.2398	864.138	53.0246	516.94	83.4545
640.367	80.5453	871.854	51.9482	518.869	84.2844
644.225	90.3253	879.569	51.2988	520.798	84.601
648.082	94.0076	887.285	51.0513	522.726	83.1128
651.94	92.989	895	50.999	524.655	82.8623
655.797	91.516	902.716	51.0652	526.584	83.5294
659.655	90.3508	910.431	51.4605	528.513	84.2493
663.513	87.8144	918.147	52.4889	530.442	84.5401
667.37	84.0552	925.862	54.2005	532.371	85.0663
671.228	81.1357	933.578	56.2678	534.3	85.0707
675.086	78.8947	941.293	58.2178	536.229	82.8356
678.943	72.5761	949.009	59.7947	538.158	80.7879
682.801	62.7045	956.724	61.1029	540.086	79.9285
686.659	44.699	964.44	62.41	542.015	79.9986
690.516	24.8845	972.156	63.8066	543.944	80.8636
694.374	26.5805	979.871	65.0859	545.873	82.2934
698.231	58.7849	987.587	65.9841	547.802	82.6897
702.089	84.6273	995.302	66.5227	549.731	82.8447
705.947	92.5544	1003.02	67.0139	551.66	82.8723
709.804	94.4122	1010.73	67.6941	553.589	82.3221
713.662	94.8782	1018.45	68.4023	555.517	82.8972
717.52	93.7215	1026.16	68.6826	557.446	82.4669
721.377	92.3212	1033.88	68.2371	559.375	81.9218
725.235	91.5263	1041.6	67.259	561.304	81.9307
729.092	88.2826	1049.31	66.2788	563.233	82.0373
732.95	87.8919	1057.03	65.6784	565.162	81.7297
736.808	88.7938	1064.74	65.407	567.091	81.2849
740.665	83.9559	1072.46	65.1763	569.02	81.89
744.523	74.8743	1080.17	64.8539	570.948	82.6206
748.381	79.8939	1087.89	64.6177	572.877	82.5356
752.238	92.3763	1095.6	64.7027	574.806	82.4468
756.096	96.4707	1103.32	65.0361	576.735	81.1102
759.953	96.2869	1111.03	65.2151	578.664	81.2196
763.811	94.8004	1118.75	64.9105	580.593	81.2281
767.669	93.4155	1126.47	64.2421	582.522	80.1885
771.526	92.1199	1134.18	63.6872	584.451	79.9914
775.384	91.2846	1141.9	63.6378	586.38	80.1208
779.242	90.3384	1149.61	64.0762	588.308	80.3746
783.099	90.2261	1157.33	64.6673	590.237	80.3265
786.957	91.1181	1165.04	65.1323	592.166	79.513
790.815	91.89	1172.76	65.487	594.095	78.9995
794.672	91.3863	1180.47	65.9249	596.024	79.4856
798.53	90.1599	1188.19	66.498	597.953	79.2587
802.387	88.687	1195.91	66.9716	599.882	79.323
806.245	85.8602	1203.62	67.0481	601.811	78.9406
810.103	80.2818	1211.34	66.7217	603.739	79.3092
813.96	71.353	1219.05	66.3619	605.668	79.0134
817.818	54.7159	1226.77	66.4523	607.597	78.9657
821.676	44.5035	1234.48	67.2524	609.526	79.1171
825.533	60.7528	1242.2	68.6507	611.455	79.2448
829.391	77.2161	1249.91	70.2994	613.384	78.8928
833.249	79.8452	1257.63	71.9052	615.313	78.8603
837.106	75.7058	1265.35	73.4101	617.242	78.6871
840.964	63.824	1273.06	74.9189	619.17	78.567
844.821	53.0209	1280.78	76.4623	621.099	78.7078
848.679	58.9002	1288.49	77.8627	623.028	78.2938
852.537	71.5363	1296.21	78.8597	624.957	77.9695
856.394	76.2587	1303.92	79.3563	626.886	77.6937
860.252	81.3047	1311.64	79.5255	628.815	77.2781
864.11	88.2789	1319.35	79.6547	630.744	76.9975
867.967	90.868	1327.07	79.8328	632.673	76.7029
871.825	89.5859	1334.78	79.8483	634.602	76.3426
875.682	86.4062	1342.5	79.3914	636.53	76.0662
879.54	80.7851	1350.22	78.3263	638.459	75.6362
883.398	75.2438	1357.93	76.729	640.388	75.0887
887.255	70.9631	1365.65	74.725	642.317	74.5343
891.113	68.1099	1373.36	72.287	644.246	74.0563
894.971	66.7762	1381.08	69.1492	646.175	73.2908
898.828	61.9164	1388.79	64.9632	648.104	72.3158
902.686	56.8551	1396.51	59.6185	650.033	71.6303
906.544	62.1202	1404.22	53.3613	651.961	71.1218
910.401	72.0957	1411.94	46.572	653.89	71.2265
914.259	79.2567	1419.66	39.4771	655.819	71.5628
918.116	82.6384	1427.37	32.1854	657.748	71.8131
921.974	83.5061	1435.09	24.9164	659.677	71.8396
925.832	83.7032	1442.8	18.0951	661.606	71.4462
929.689	83.7666	1450.52	12.1989	663.535	71.9676
933.547	82.195	1458.23	7.54169	665.464	72.7502
937.405	78.3591	1465.95	4.18515	667.392	70.0059
941.262	72.7842	1473.66	2.02084	669.321	68.0087
945.12	71.3075	1481.38	1.00775	671.25	68.4957
948.977	77.8252	1489.1	1.30909	673.179	68.8673
952.835	85.4996	1496.81	3.05174	675.108	67.6548
956.693	87.1613	1504.53	5.99118	677.037	67.4447
960.55	85.589	1512.24	9.48774	678.966	67.0427
964.408	84.2862	1519.96	12.89	680.895	66.3605
968.266	82.5342	1527.67	15.7802	682.824	65.8166
972.123	80.4383	1535.39	17.9969	684.752	66.3404
975.981	78.6869	1543.1	19.4805	686.681	66.8315
979.839	75.9051	1550.82	20.1907	688.61	66.2117
983.696	72.3573	1558.54	20.094	690.539	66.3506
987.554	68.2542	1566.25	19.368	692.468	66.0017
991.411	64.0373	1573.97	18.5826	694.397	65.911
995.269	57.9988	1581.68	18.6234	696.326	65.8331
999.127	48.6369	1589.4	20.3178	698.255	66.1384
1002.98	42.7152	1597.11	24.0874	700.183	66.1055
1006.84	52.5785	1604.83	29.803	702.112	66.5238
1010.7	59.5602	1612.54	36.9695	704.041	67.4669
1014.56	49.3589	1620.26	44.9462	705.97	68.0548
1018.41	36.2964	1627.97	53.1191	707.899	67.7068
1022.27	26.8902	1635.69	60.7801	709.828	67.0977
1026.13	23.0493	1643.41	67.104	711.757	66.656
1029.99	41.9614	1651.12	71.3547	713.686	65.8916
1033.85	73.0876	1658.84	73.2389	715.614	64.8811
1037.7	87.5233	1666.55	72.9464	717.543	63.0922
1041.56	89.5507	1674.27	70.9212	719.472	60.0268
1045.42	88.4106	1681.98	67.6393	721.401	58.7374
1049.28	86.9689	1689.7	63.4452	723.33	60.0601
1053.13	85.0657	1697.41	58.641	725.259	61.7362
1056.99	80.8742	1705.13	53.6674	727.188	62.9916
1060.85	73.2983	1712.85	49.1651	729.117	64.1598
1064.71	67.8484	1720.56	45.6373	731.046	64.7119
1068.56	69.921	1728.28	43.0985	732.974	65.2906
1072.42	74.7387	1735.99	41.1601	734.903	66.2316
1076.28	77.072	1743.71	39.5464	736.832	67.4774
1080.14	75.5222	1751.42	38.3819	738.761	68.4835
1083.99	69.5466	1759.14	37.9757	740.69	69.4984
1087.85	63.6455	1766.85	38.4776	742.619	70.2413
1091.71	60.8475	1774.57	39.7375	744.548	70.5271
1095.57	61.025	1782.29	41.3012	746.477	70.6555
1099.43	60.3157	1790	42.7321	748.405	70.8054
1103.28	50.1328	1797.72	43.9588	750.334	70.9744
1107.14	34.0898	1805.43	45.3084	752.263	71.4694
1111	23.1837	1813.15	47.0374	754.192	72.0765
1114.86	29.5348	1820.86	49.0263	756.121	72.2628
1118.71	41.9379	1828.58	50.8988	758.05	72.4342
1122.57	49.6809	1836.29	52.4357	759.979	72.4416
1126.43	65.9683	1844.01	53.7811	761.908	72.3566
1130.29	78.6376	1851.72	55.2364	763.836	72.2805
1134.14	80.2189	1859.44	56.9264	765.765	72.3383
1138	76.1916	1867.16	58.6928	767.694	72.2892
1141.86	68.1433	1874.87	60.2551	769.623	72.1041
1145.72	58.7721	1882.59	61.4682	771.552	72.1723
1149.57	51.6949	1890.3	62.4802	773.481	72.4948
1153.43	45.6985	1898.02	63.6135	775.41	72.7509
1157.29	44.6341	1905.73	65.0084	777.339	72.573
1161.15	48.6292	1913.45	66.4974	779.268	72.1981
1165	44.7345	1921.16	67.8444	781.196	72.1281
1168.86	31.6862	1928.88	69.0163	783.125	72.1448
1172.72	19.9446	1936.6	70.2097	785.054	72.4862
1176.58	18.7373	1944.31	71.6313	786.983	72.893
1180.44	21.3974	1952.03	73.274	788.912	73.2158
1184.29	24.4643	1959.74	74.9198	790.841	73.3208
1188.15	34.8698	1967.46	76.3625	792.77	73.3956
1192.01	46.1649	1975.17	77.5778	794.699	73.6287
1195.87	52.7179	1982.89	78.7033	796.627	73.883
1199.72	51.1738	1990.6	79.8791	798.556	73.9201
1203.58	42.2177	1998.32	81.0806	800.485	73.7679
1207.44	31.4175	2006.04	82.1175	802.414	73.6235
1211.3	20.5655	2013.75	82.8447	804.343	73.2412
1215.15	17.734	2021.47	83.3324	806.272	73.0605
1219.01	31.3751	2029.18	83.8119	808.201	72.9297
1222.87	47.2796	2036.9	84.4706	810.13	72.5608
1226.73	50.3698	2044.61	85.309	812.058	72.4332
1230.58	51.3217	2052.33	86.1734	813.987	72.2861
1234.44	60.3197	2060.04	86.9267	815.916	72.0838
1238.3	70.9921	2067.76	87.5553	817.845	71.6678
1242.16	78.5373	2075.47	88.144	819.774	70.8415
1246.02	82.8015	2083.19	88.7651	821.703	69.885
1249.87	84.8739	2090.91	89.3819	823.632	69.3207
1253.73	86.2957	2098.62	89.8592	825.561	69.2023
1257.59	87.6216	2106.34	90.1028	827.49	69.5667
1261.45	88.6964	2114.05	90.1475	829.418	70.0525
1265.3	86.8531	2121.77	90.1239	831.347	70.2804
1269.16	79.4587	2129.48	90.1402	833.276	70.3643
1273.02	69.6262	2137.2	90.2079	835.205	70.0664
1276.88	68.5101	2144.91	90.2708	837.134	70.0207
1280.73	78.2904	2152.63	90.2844	839.063	69.7647
1284.59	87.3287	2160.35	90.2517	840.992	69.6645
1288.45	91.6639	2168.06	90.2318	842.921	69.5173
1292.31	93.3503	2175.78	90.2772	844.849	69.3624
1296.16	92.1177	2183.49	90.3766	846.778	69.2578
1300.02	90.1415	2191.21	90.4692	848.707	68.9623
1303.88	89.8726	2198.92	90.5061	850.636	68.3047
1307.74	89.5269	2206.64	90.4931	852.565	67.6596
1311.59	89.1359	2214.35	90.4804	854.494	67.0082
1315.45	90.8119	2222.07	90.5041	856.423	65.8602
1319.31	93.3313	2229.79	90.5325	858.352	64.3685
1323.17	96.0143	2237.5	90.4883	860.28	62.603
1327.03	95.2837	2245.22	90.3334	862.209	61.0769
1330.88	94.1512	2252.93	90.1188	864.138	60.1708
1334.74	92.5513	2260.65	89.9349	866.067	59.8948
1338.6	91.3813	2268.36	89.8268	867.996	60.535
1342.46	91.3915	2276.08	89.7601	869.925	61.8064
1346.31	91.4046	2283.79	89.6594	871.854	62.833
1350.17	88.2429	2291.51	89.5022	873.783	63.3196
1354.03	83.0007	2299.22	89.3663	875.712	63.5303
1357.89	76.0464	2306.94	89.3463	877.64	63.5101
1361.74	66.8995	2314.66	89.4835	879.569	63.3524
1365.6	58.1185	2322.37	89.7197	881.498	63.0608
1369.46	53.9156	2330.09	89.9033	883.427	62.7745
1373.32	59.5695	2337.8	89.987	885.356	62.468
1377.17	70.2423	2345.52	90.0728	887.285	62.2137
1381.03	76.7532	2353.23	90.2146	889.214	62.1377
1384.89	76.382	2360.95	90.3113	891.143	62.2362
1388.75	75.8361	2368.66	90.3097	893.071	62.7353
1392.61	77.8236	2376.38	90.2625	895	63.13
1396.46	76.6214	2384.1	90.2914	896.929	63.3922
1400.32	75.874	2391.81	90.4475	898.858	63.3508
1404.18	73.5797	2399.53	90.6534	900.787	63.1866
1408.04	69.6145	2407.24	90.8091	902.716	63.0798
1411.89	66.5771	2414.96	90.8673	904.645	63.0967
1415.75	68.3708	2422.67	90.8328	906.574	63.1858
1419.61	68.3422	2430.39	90.7949	908.502	63.0235
1423.47	70.6724	2438.1	90.7972	910.431	62.8102
1427.32	79.4009	2445.82	90.7411	912.36	62.1341
1431.18	83.8989	2453.54	90.525	914.289	61.1438
1435.04	82.2486	2461.25	90.2361	916.218	59.8949
1438.9	81.4344	2468.97	90.0268	918.147	58.995
1442.75	80.7952	2476.68	89.9684	920.076	58.5815
1446.61	80.0901	2484.4	90.0109	922.005	58.3708
1450.47	78.664	2492.11	90.0625	923.934	58.575
1454.33	77.4779	2499.83	90.0675	925.862	58.9864
1458.18	76.7758	2507.54	90.0078	927.791	59.6348
1462.04	76.5909	2515.26	89.9162	929.72	60.0336
1465.9	77.7711	2522.98	89.843	931.649	60.1605
1469.76	79.146	2530.69	89.8158	933.578	60.1828
1473.62	81.1379	2538.41	89.8246	935.507	60.0009
1477.47	83.1786	2546.12	89.8381	937.436	59.3577
1481.33	86.3212	2553.84	89.8377	939.365	58.1737
1485.19	86.6297	2561.55	89.8559	941.293	56.3222
1489.05	87.9443	2569.27	89.95	943.222	53.5082
1492.9	89.3504	2576.98	90.1412	945.151	50.0792
1496.76	90.4265	2584.7	90.3748	947.08	46.4212
1500.62	91.0435	2592.41	90.5571	949.009	43.352
1504.48	87.6721	2600.13	90.654	950.938	41.4986
1508.33	83.1789	2607.85	90.7332	952.867	40.5286
1512.19	78.1867	2615.56	90.8971	954.796	40.0475
1516.05	76.165	2623.28	91.1871	956.724	39.9508
1519.91	78.4558	2630.99	91.5458	958.653	40.9641
1523.76	80.441	2638.71	91.8741	960.582	43.2532
1527.62	84.8146	2646.42	92.123	962.511	46.5939
1531.48	88.2516	2654.14	92.3318	964.44	49.9798
1535.34	88.6177	2661.85	92.5775	966.369	52.4619
1539.2	90.1979	2669.57	92.8863	968.298	53.973
1543.05	91.0683	2677.29	93.1912	970.227	54.9616
1546.91	91.7933	2685	93.3857	972.156	56.0217
1550.77	91.8094	2692.72	93.4231	974.084	57.3012
1554.63	92.2996	2700.43	93.3573	976.013	58.7168
1558.48	92.738	2708.15	93.2809	977.942	59.8477
1562.34	93.1685	2715.86	93.2241	979.871	60.7302
1566.2	93.6247	2723.58	93.1323	981.8	61.1948
1570.06	94.0459	2731.29	92.9401	983.729	61.2289
1573.91	93.9531	2739.01	92.6408	985.658	61.2533
1577.77	93.4923	2746.73	92.2812	987.587	61.3186
1581.63	94.1006	2754.44	91.9108	989.515	61.3164
1585.49	91.611	2762.16	91.5432	991.444	61.3217
1589.34	88.7935	2769.87	91.1524	993.373	61.1922
1593.2	85.5861	2777.59	90.7054	995.302	60.6419
1597.06	78.9013	2785.3	90.1948	997.231	59.7563
1600.92	68.1076	2793.02	89.6312	999.16	58.6842
1604.77	57.5159	2800.73	89.0073	1001.09	57.7805
1608.63	62.6612	2808.45	88.2789	1003.02	57.2215
1612.49	78.2916	2816.16	87.3865	1004.95	56.9117
1616.35	90.568	2823.88	86.2494	1006.88	57.0346
1620.21	95.5847	2831.6	84.6848	1008.8	57.697
1624.06	98.021	2839.31	82.4271	1010.73	58.8145
1627.92	99.4607	2847.03	79.3779	1012.66	59.9081
1631.78	99.4865	2854.74	75.8037	1014.59	60.9406
1635.64	98.8902	2862.46	72.1867	1016.52	61.974
1639.49	98.2328	2870.17	68.9031	1018.45	62.7279
1643.35	99.1717	2877.89	66.0751	1020.38	63.1012
1647.21	99.2758	2885.6	63.6495	1022.31	63.4001
1651.07	99.3902	2893.32	61.5361	1024.24	63.6338
1654.92	99.5762	2901.04	59.6281	1026.16	63.5836
1658.78	100	2908.75	57.7414	1028.09	63.2749
1662.64	99.9137	2916.47	55.6517	1030.02	62.9184
1666.5	99.0042	2924.18	53.2714	1031.95	62.4514
1670.35	98.3336	2931.9	50.7902	1033.88	61.9654
1674.21	97.6333	2939.61	48.6087	1035.81	61.5112
1678.07	96.8371	2947.33	47.1039	1037.74	60.6593
1681.93	96.119	2955.04	46.492	1039.67	59.4789
1685.79	95.3678	2962.76	46.9335	1041.6	58.3626
1689.64	94.3704	2970.48	48.6442	1043.52	57.1524
1693.5	94.159	2978.19	51.746	1045.45	56.0354
1697.36	93.7703	2985.91	55.9997	1047.38	55.0039
1701.22	93.335	2993.62	60.7547	1049.31	54.3628
1705.07	92.8943	3001.34	65.2451	1051.24	54.106
1708.93	92.4851	3009.05	69.0016	1053.17	53.892
1712.79	91.8623	3016.77	72.0119	1055.1	53.8845
1716.65	90.7874	3024.48	74.5019	1057.03	54.3293
1720.5	89.9403	3032.2	76.6227	1058.96	55.1557
1724.36	89.2075	3039.91	78.3786	1060.88	55.7017
1728.22	84.531	3047.63	79.7794	1062.81	55.9754
1732.08	73.5956	3055.35	80.9326	1064.74	56.0773
1735.93	57.7453	3063.06	81.9667	1066.67	55.9411
1739.79	55.9148	3070.78	82.9393	1068.6	55.3505
1743.65	62.4826	3078.49	83.8384	1070.53	54.3385
1747.51	71.0028	3086.21	84.6365	1072.46	53.0838
1751.36	80.7497	3093.92	85.3205	1074.39	51.4194
1755.22	84.5464	3101.64	85.8797	1076.32	49.6966
1759.08	87.3546	3109.35	86.2984	1078.24	48.1921
1762.94	89.7994	3117.07	86.5676	1080.17	47.0421
1766.8	90.5415	3124.79	86.6947	1082.1	46.1805
1770.65	91.7647	3132.5	86.6892	1084.03	45.7303
1774.51	92.9794	3140.22	86.5592	1085.96	45.9069
1778.37	93.8676	3147.93	86.3149	1087.89	46.5243
1782.23	94.5972	3155.65	85.9722	1089.82	47.5846
1786.08	95.8067	3163.36	85.553	1091.75	49.2789
1789.94	95.5903	3171.08	85.0814	1093.67	51.5247
1793.8	95.9945	3178.79	84.5776	1095.6	53.6829
1797.66	96.3134	3186.51	84.0533	1097.53	55.7356
1801.51	96.6025	3194.23	83.5168	1099.46	57.524
1805.37	96.9331	3201.94	82.9754	1101.39	59.0422
1809.23	97.3136	3209.66	82.4356	1103.32	59.9698
1813.09	97.653	3217.37	81.8999	1105.25	60.2296
1816.94	98.3116	3225.09	81.3667	1107.18	60.068
1820.8	98.206	3232.8	80.8329	1109.11	59.8471
1824.66	98.4021	3240.52	80.2963	1111.03	59.7536
1828.52	98.5106	3248.23	79.7562	1112.96	59.374
1832.38	98.506	3255.95	79.2126	1114.89	58.9681
1836.23	98.5351	3263.66	78.6646	1116.82	58.7362
1840.09	98.6439	3271.38	78.1113	1118.75	58.5352
1843.95	98.7317	3279.1	77.5525	1120.68	58.2955
1847.81	98.7748	3286.81	76.9903	1122.61	58.274
1851.66	98.8279	3294.53	76.4282	1124.54	58.2508
1855.52	99.2083	3302.24	75.8697	1126.47	57.8988
1859.38	98.8595	3309.96	75.3166	1128.39	57.4227
1863.24	98.9263	3317.67	74.7697	1130.32	56.8283
1867.09	98.8972	3325.39	74.2294	1132.25	56.3387
1870.95	98.8043	3333.1	73.693	1134.18	55.9803
1874.81	98.7038	3340.82	73.1526	1136.11	55.9762
1878.67	98.9532	3348.54	72.5944	1138.04	56.1259
1882.52	98.4808	3356.25	72.0011	1139.97	56.5983
1886.38	98.3837	3363.97	71.3524	1141.9	57.3347
1890.24	98.2053	3371.68	70.6262	1143.83	57.9842
1894.1	97.9822	3379.4	69.7987	1145.75	58.6424
1897.95	97.7939	3387.11	68.8538	1147.68	59.2013
1901.81	97.8367	3394.83	67.8067	1149.61	59.4745
1905.67	97.5783	3402.54	66.7086	1151.54	59.4876
1909.53	97.4724	3410.26	65.6224	1153.47	59.5765
1913.39	97.3386	3417.98	64.6001	1155.4	59.541
1917.24	97.4594	3425.69	63.6747	1157.33	59.2265
1921.1	97.5615	3433.41	62.8644	1159.26	58.9335
1924.96	97.7058	3441.12	62.1826	1161.19	58.6837
1928.82	98.095	3448.84	61.6371	1163.11	58.3015
1932.67	98.1085	3456.55	61.2229	1165.04	57.7125
1936.53	98.0745	3464.27	60.9178	1166.97	57.1011
1940.39	98.2111	3471.98	60.6899	1168.9	56.451
1944.25	98.3007	3479.7	60.5177	1170.83	55.9735
1948.1	98.3967	3487.42	60.4095	1172.76	55.5372
1951.96	98.6558	3495.13	60.3963	1174.69	54.8879
1955.82	98.5196	3502.85	60.5099	1176.62	54.3061
1959.68	98.599	3510.56	60.7755	1178.55	53.9021
1963.53	98.6095	3518.28	61.2099	1180.47	53.6121
1967.39	98.5491	3525.99	61.8184	1182.4	53.2082
1971.25	98.4763	3533.71	62.5931	1184.33	52.8396
1975.11	98.5271	3541.42	63.5147	1186.26	52.4896
1978.97	98.2336	3549.14	64.5578	1188.19	52.1526
1982.82	98.1988	3556.85	65.6973	1190.12	51.7899
1986.68	97.9126	3564.57	66.9039	1192.05	51.2679
1990.54	97.9246	3572.29	68.1293	1193.98	50.6361
1994.4	97.1114	3580	69.3156	1195.91	50.1031
1998.25	98.353	3587.72	70.4123	1197.83	49.8334
2002.11	98.863	3595.43	71.3865	1199.76	49.6121
2005.97	98.8838	3603.15	72.2232	1201.69	49.2466
2009.83	98.8393	3610.86	72.9194	1203.62	48.8814
2013.68	98.3489	3618.58	73.4793	1205.55	48.5965
2017.54	97.5215	3626.29	73.9167	1207.48	48.3916
2021.4	97.7257	3634.01	74.2597	1209.41	48.3057
2025.26	97.9696	3641.73	74.5515	1211.34	48.3175
2029.11	98.1533	3649.44	74.8411	1213.27	48.3188
2032.97	98.2655	3657.16	75.167	1215.19	48.3448
2036.83	98.2419	3664.87	75.5418	1217.12	48.3167
2040.69	97.9007	3672.59	75.9638	1219.05	48.404
2044.54	98.0707	3680.3	76.423	1220.98	48.4703
2048.4	98.1074	3688.02	76.9022	1222.91	48.4721
2052.26	98.0425	3695.73	77.3804	1224.84	48.4121
2056.12	98.094	3703.45	77.838	1226.77	48.2532
2059.98	97.9817	3711.17	78.2608	1228.7	48.1842
2063.83	97.6082	3718.88	78.641	1230.63	47.9366
2067.69	97.8651	3726.6	78.9754	1232.55	47.5904
2071.55	98.2675	3734.31	79.2635	1234.48	47.342
2075.41	98.3185	3742.03	79.5072	1236.41	47.3285
2079.26	98.2611	3749.74	79.7112	1238.34	47.4008
2083.12	98.1586	3757.46	79.8807	1240.27	47.4693
2086.98	97.9041	3765.17	80.0194	1242.2	47.497
2090.84	97.8658	3772.89	80.1283	1244.13	47.3991
2094.69	98.049	3780.6	80.207	1246.06	47.2614
2098.55	98.0081	3788.32	80.2543	1247.99	47.1711
2102.41	97.7896	3796.04	80.2719	1249.91	47.1289
2106.27	97.6394	3803.75	80.265	1251.84	47.05
2110.12	97.5745	3811.47	80.2432	1253.77	46.9417
2113.98	97.5967	3819.18	80.2159	1255.7	46.7978
2117.84	97.8223	3826.9	80.189	1257.63	46.7003
2121.7	97.9544	3834.61	80.1635	1259.56	46.6222
2125.56	98.0029	3842.33	80.1375	1261.49	46.415
2129.41	97.9436	3850.04	80.1091	1263.42	46.1618
2133.27	97.6475	3857.76	80.08	1265.35	45.7525
2137.13	97.5363	3865.48	80.0567	1267.27	45.303
2140.99	97.814	3873.19	80.0497	1269.2	44.9249
2144.84	97.8953	3880.91	80.0722	1271.13	44.5571
2148.7	97.835	3888.62	80.1396	1273.06	44.111
2152.56	97.8489	3896.34	80.2685	1274.99	43.8806
2156.42	97.7535	3904.05	80.4744	1276.92	43.5348
2160.27	97.5185	3911.77	80.7671	1278.85	43.2533
2164.13	97.2584	3919.48	81.1474	1280.78	43.2863
2167.99	97.2088	3927.2	81.6067	1282.71	43.627
2171.85	97.2099	3934.92	82.1302	1284.63	44.1448
2175.7	97.1446	3942.63	82.7014	1286.56	44.6164
2179.56	97.0474	3950.35	83.3048	1288.49	44.8714
2183.42	97.0417	3958.06	83.9275	1290.42	44.9865
2187.28	96.9879	3965.78	84.5593	1292.35	45.0066
2191.13	96.7838	3973.49	85.1924	1294.28	45.1097
2194.99	96.4825	3981.21	85.8212	1296.21	45.2046
2198.85	96.1994	3988.92	86.433	1298.14	45.1578
2202.71	95.9506	3996.64	87.0414	1300.07	45.114
2206.57	95.7922	4004.35	87.6491	1301.99	45.1496
2210.42	95.7079			1303.92	45.2067
2214.28	95.6731			1305.85	45.6167
2218.14	95.6979			1307.78	45.8521
2222	95.8392			1309.71	46.0305
2225.85	95.8599			1311.64	46.2006
2229.71	95.7835			1313.57	46.3739
2233.57	95.7769			1315.5	46.5696
2237.43	95.6497			1317.43	46.7773
2241.28	95.1885			1319.35	46.9568
2245.14	94.8242			1321.28	47.0976
2249	94.7505			1323.21	47.3513
2252.86	94.9667			1325.14	47.539
2256.71	94.9911			1327.07	47.7706
2260.57	95.0268			1329	47.99
2264.43	95.0277			1330.93	47.9885
2268.29	94.966			1332.86	47.9522
2272.15	94.869			1334.78	48.0503
2276	94.7503			1336.71	47.6888
2279.86	94.5846			1338.64	46.9889
2283.72	94.3859			1340.57	46.0928
2287.58	94.1333			1342.5	44.8357
2291.43	93.8385			1344.43	44.3809
2295.29	93.504			1346.36	44.0611
2299.15	93.172			1348.29	44.1159
2303.01	92.9503			1350.22	44.4511
2306.86	92.8192			1352.14	45.0198
2310.72	92.7375			1354.07	45.5043
2314.58	92.7877			1356	45.6602
2318.44	93.0148			1357.93	45.9526
2322.29	93.4596			1359.86	45.9855
2326.15	93.9836			1361.79	45.6711
2330.01	94.3106			1363.72	45.405
2333.87	94.3134			1365.65	45.0799
2337.72	94.1706			1367.58	45.3444
2341.58	94.1488			1369.5	45.0909
2345.44	94.1141			1371.43	45.5195
2349.3	94.0192			1373.36	45.0859
2353.16	94.0047			1375.29	43.8204
2357.01	94.0334			1377.22	42.8259
2360.87	94.1971			1379.15	42.7738
2364.73	94.3859			1381.08	43.6353
2368.59	94.3203			1383.01	44.7146
2372.44	94.2122			1384.94	45.4223
2376.3	94.1508			1386.86	43.239
2380.16	94.0639			1388.79	41.7728
2384.02	94.0203			1390.72	40.9859
2387.87	94.18			1392.65	40.71
2391.73	94.7518			1394.58	39.0016
2395.59	94.8033			1396.51	37.5581
2399.45	94.6351			1398.44	36.4169
2403.3	94.51			1400.37	34.4589
2407.16	94.6308			1402.3	33.5217
2411.02	94.6991			1404.22	33.1692
2414.88	94.5983			1406.15	31.9187
2418.74	94.4087			1408.08	31.5937
2422.59	94.3617			1410.01	31.4265
2426.45	94.5174			1411.94	30.5521
2430.31	94.5499			1413.87	30.224
2434.17	94.264			1415.8	31.207
2438.02	94.0829			1417.73	31.3105
2441.88	94.0225			1419.66	31.233
2445.74	93.9566			1421.58	31.4234
2449.6	94.0175			1423.51	31.805
2453.45	94.0448			1425.44	31.9228
2457.31	93.9869			1427.37	32.2411
2461.17	94.0405			1429.3	32.4939
2465.03	93.8885			1431.23	32.6764
2468.88	93.6746			1433.16	33.1789
2472.74	93.6933			1435.09	33.5264
2476.6	93.6736			1437.02	33.6118
2480.46	93.5594			1438.94	33.8209
2484.32	93.4949			1440.87	34.3217
2488.17	93.4151			1442.8	34.1495
2492.03	93.2452			1444.73	34.3458
2495.89	92.9151			1446.66	34.6921
2499.75	92.8277			1448.59	34.3162
2503.6	92.7178			1450.52	34.5347
2507.46	92.7177			1452.45	34.6112
2511.32	92.8515			1454.38	35.2957
2515.18	92.9924			1456.3	34.104
2519.03	92.984			1458.23	30.5982
2522.89	92.9788			1460.16	29.373
2526.75	92.9728			1462.09	29.4518
2530.61	93.0777			1464.02	28.3603
2534.46	93.1614			1465.95	26.3858
2538.32	93.1717			1467.88	27.5673
2542.18	93.1779			1469.81	30.5912
2546.04	93.0893			1471.74	32.8883
2549.89	92.9506			1473.66	32.9041
2553.75	92.9179			1475.59	33.2213
2557.61	92.9125			1477.52	32.8159
2561.47	92.9673			1479.45	33.6325
2565.33	92.9939			1481.38	34.0211
2569.18	93.0686			1483.31	34.6292
2573.04	93.2713			1485.24	35.8787
2576.9	93.325			1487.17	36.793
2580.76	93.2649			1489.1	37.4393
2584.61	93.2188			1491.02	37.2972
2588.47	93.2425			1492.95	37.6006
2592.33	93.2742			1494.88	40.6329
2596.19	93.2597			1496.81	42.6666
2600.04	93.2689			1498.74	44.1537
2603.9	93.3598			1500.67	45.5917
2607.76	93.3252			1502.6	47.535
2611.62	93.2413			1504.53	49.5546
2615.47	93.149			1506.46	48.4312
2619.33	92.9609			1508.38	47.1685
2623.19	92.9809			1510.31	47.7748
2627.05	92.9857			1512.24	47.5515
2630.91	92.7544			1514.17	48.4177
2634.76	92.6099			1516.1	47.7377
2638.62	92.5423			1518.03	46.0879
2642.48	92.2548			1519.96	45.28
2646.34	91.9934			1521.89	44.0451
2650.19	91.7973			1523.82	43.1104
2654.05	91.6163			1525.74	42.3936
2657.91	91.4477			1527.67	40.4529
2661.77	91.3773			1529.6	39.4934
2665.62	91.3169			1531.53	39.7347
2669.48	91.3114			1533.46	36.9892
2673.34	91.3296			1535.39	34.8771
2677.2	91.2722			1537.32	35.9555
2681.05	91.3072			1539.25	33.5399
2684.91	91.3383			1541.18	31.2556
2688.77	91.2737			1543.1	29.753
2692.63	91.1315			1545.03	27.6403
2696.48	90.9766			1546.96	26.4709
2700.34	91.0356			1548.89	25.5439
2704.2	91.154			1550.82	22.1214
2708.06	91.1147			1552.75	20.3687
2711.92	90.9269			1554.68	17.0259
2715.77	90.7913			1556.61	15.5664
2719.63	90.6421			1558.54	10.7507
2723.49	90.4245			1560.46	4.29566
2727.35	90.379			1562.39	6.51088
2731.2	90.43			1564.32	9.38153
2735.06	90.4955			1566.25	13.5519
2738.92	90.5909			1568.18	17.4787
2742.78	90.5028			1570.11	21.2128
2746.63	90.49			1572.04	24.5477
2750.49	90.3845			1573.97	27.8224
2754.35	90.4313			1575.89	29.4551
2758.21	90.3631			1577.82	30.685
2762.06	90.2079			1579.75	32.9002
2765.92	89.9819			1581.68	35.028
2769.78	89.9108			1583.61	36.8839
2773.64	89.8063			1585.54	38.8854
2777.5	89.633			1587.47	40.8621
2781.35	89.5773			1589.4	42.9302
2785.21	89.5635			1591.33	44.8997
2789.07	89.2555			1593.25	46.9054
2792.93	88.7518			1595.18	48.7925
2796.78	88.1738			1597.11	50.8902
2800.64	87.7482			1599.04	52.8551
2804.5	87.5253			1600.97	54.7381
2808.36	87.1653			1602.9	56.4741
2812.21	86.8231			1604.83	58.3067
2816.07	86.6233			1606.76	59.8364
2819.93	86.6724			1608.69	60.7942
2823.79	86.7616			1610.61	61.9735
2827.64	86.9841			1612.54	63.6079
2831.5	87.3132			1614.47	64.4507
2835.36	87.4775			1616.4	64.532
2839.22	87.2919			1618.33	64.8085
2843.07	86.9746			1620.26	66.7254
2846.93	86.4084			1622.19	67.1327
2850.79	85.1757			1624.12	66.823
2854.65	83.4407			1626.05	67.5121
2858.51	82.0087			1627.97	67.4741
2862.36	81.5221			1629.9	67.2176
2866.22	81.3999			1631.83	68.7409
2870.08	80.7415			1633.76	69.3316
2873.94	80.1359			1635.69	68.0217
2877.79	80.4421			1637.62	66.9608
2881.65	81.1243			1639.55	67.1537
2885.51	81.6403			1641.48	67.4069
2889.37	81.9792			1643.41	68.5899
2893.22	81.9821			1645.33	68.6618
2897.08	81.6505			1647.26	65.6934
2900.94	81.3991			1649.19	65.0919
2904.8	81.0044			1651.12	67.0104
2908.65	80.7008			1653.05	64.8606
2912.51	80.837			1654.98	62.5074
2916.37	80.8567			1656.91	62.2848
2920.23	80.2795			1658.84	63.0447
2924.09	79.431			1660.77	63.6048
2927.94	78.4701			1662.69	62.0645
2931.8	77.8543			1664.62	60.973
2935.66	78.0894			1666.55	62.6327
2939.52	78.6446			1668.48	60.8879
2943.37	78.681			1670.41	59.7494
2947.23	78.066			1672.34	59.1829
2951.09	76.6771			1674.27	58.8627
2954.95	75.2378			1676.2	56.6377
2958.8	74.8359			1678.13	56.8566
2962.66	75.8508			1680.05	56.6975
2966.52	78.0904			1681.98	55.9212
2970.38	80.5103			1683.91	54.179
2974.23	82.1697			1685.84	52.3551
2978.09	82.879			1687.77	51.8782
2981.95	83.1492			1689.7	50.2379
2985.81	83.6116			1691.63	49.3658
2989.66	84.5553			1693.56	50.6041
2993.52	85.6261			1695.49	48.9179
2997.38	86.5134			1697.41	47.8029
3001.24	86.5316			1699.34	47.4552
3005.1	86.3187			1701.27	46.1646
3008.95	86.7557			1703.2	46.1047
3012.81	87.223			1705.13	45.9031
3016.67	87.5818			1707.06	44.5076
3020.53	87.7419			1708.99	44.1399
3024.38	87.9367			1710.92	44.6642
3028.24	87.873			1712.85	45.7868
3032.1	87.65			1714.77	46.0621
3035.96	87.9369			1716.7	46.1486
3039.81	88.3021			1718.63	45.9633
3043.67	88.5521			1720.56	45.9823
3047.53	88.7647			1722.49	47.0087
3051.39	89.2675			1724.42	47.2503
3055.24	89.7242			1726.35	48.1168
3059.1	89.9938			1728.28	49.3636
3062.96	90.1755			1730.21	49.5887
3066.82	90.4165			1732.13	50.1037
3070.68	90.8698			1734.06	50.0946
3074.53	90.9567			1735.99	50.0481
3078.39	90.5755			1737.92	51.1977
3082.25	90.6517			1739.85	51.759
3086.11	90.953			1741.78	52.5903
3089.96	91.014			1743.71	53.7151
3093.82	91.0384			1745.64	54.8921
3097.68	90.9078			1747.57	55.9935
3101.54	90.7804			1749.49	56.8709
3105.39	91.0558			1751.42	57.5021
3109.25	91.3231			1753.35	58.4441
3113.11	91.349			1755.28	60.2449
3116.97	91.0783			1757.21	60.1978
3120.82	90.6218			1759.14	61.3485
3124.68	90.574			1761.07	61.4095
3128.54	90.9013			1763	61.3678
3132.4	91.1933			1764.93	62.2027
3136.25	91.4212			1766.85	62.7502
3140.11	91.5554			1768.78	62.8221
3143.97	91.5667			1770.71	63.0733
3147.83	91.4871			1772.64	63.0574
3151.69	91.3133			1774.57	63.0972
3155.54	91.5396			1776.5	63.2864
3159.4	91.5206			1778.43	63.8791
3163.26	91.1169			1780.36	63.8203
3167.12	91.2017			1782.29	63.7253
3170.97	91.412			1784.21	63.9027
3174.83	90.9237			1786.14	63.5655
3178.69	90.7111			1788.07	64.3423
3182.55	90.9384			1790	64.4851
3186.4	90.9564			1791.93	64.4092
3190.26	91.0008			1793.86	64.4012
3194.12	90.7889			1795.79	64.546
3197.98	90.6655			1797.72	64.6805
3201.83	90.7528			1799.65	64.7795
3205.69	90.7324			1801.57	64.73
3209.55	90.5652			1803.5	64.6387
3213.41	90.3011			1805.43	64.5973
3217.27	90.0648			1807.36	64.8018
3221.12	90.1087			1809.29	64.8296
3224.98	90.1547			1811.22	64.8778
3228.84	89.9511			1813.15	64.8199
3232.7	90.0488			1815.08	64.9092
3236.55	90.0934			1817	65.006
3240.41	89.8965			1818.93	64.8606
3244.27	89.7641			1820.86	65.043
3248.13	90.0694			1822.79	65.1156
3251.98	90.1222			1824.72	65.0183
3255.84	89.8764			1826.65	65.0191
3259.7	89.8445			1828.58	65.065
3263.56	89.8396			1830.51	65.0128
3267.41	89.8359			1832.44	64.8386
3271.27	89.6408			1834.36	64.8825
3275.13	89.259			1836.29	64.9744
3278.99	89.1355			1838.22	64.7809
3282.84	89.3669			1840.15	64.9942
3286.7	89.5674			1842.08	64.9888
3290.56	89.4227			1844.01	64.8656
3294.42	89.2457			1845.94	64.8256
3298.28	89.0264			1847.87	64.8248
3302.13	88.9223			1849.8	64.6677
3305.99	88.8099			1851.72	64.5677
3309.85	88.5437			1853.65	64.4999
3313.71	88.4804			1855.58	64.6142
3317.56	88.5147			1857.51	64.7653
3321.42	88.425			1859.44	64.8078
3325.28	88.1718			1861.37	64.7154
3329.14	88.1596			1863.3	64.8252
3332.99	87.8391			1865.23	64.8267
3336.85	87.5212			1867.16	64.7427
3340.71	87.6113			1869.08	64.6029
3344.57	87.7794			1871.01	64.4632
3348.42	87.6675			1872.94	64.1762
3352.28	87.1921			1874.87	64.1961
3356.14	86.6307			1876.8	64.2112
3360	86.2342			1878.73	64.1646
3363.86	85.8686			1880.66	64.074
3367.71	85.8991			1882.59	64.1128
3371.57	86.3169			1884.52	64.0713
3375.43	86.2398			1886.44	64.0634
3379.29	85.8431			1888.37	64.0281
3383.14	85.5547			1890.3	63.9704
3387	85.5874			1892.23	63.9417
3390.86	85.354			1894.16	63.9481
3394.72	84.9501			1896.09	63.9271
3398.57	84.9164			1898.02	63.8317
3402.43	85.2613			1899.95	63.7968
3406.29	85.3407			1901.88	63.7826
3410.15	85.1152			1903.8	63.8068
3414	84.8252			1905.73	63.8956
3417.86	83.9787			1907.66	63.855
3421.72	83.4223			1909.59	63.8577
3425.58	84.2366			1911.52	63.8009
3429.43	84.5529			1913.45	63.7465
3433.29	84.3685			1915.38	63.8046
3437.15	83.9626			1917.31	63.7298
3441.01	83.2788			1919.24	63.6469
3444.87	82.6482			1921.16	63.6167
3448.72	83.2297			1923.09	63.5398
3452.58	84.009			1925.02	63.4621
3456.44	83.7103			1926.95	63.2165
3460.3	82.96			1928.88	63.2429
3464.15	82.9627			1930.81	63.2798
3468.01	83.7356			1932.74	63.3489
3471.87	83.9155			1934.67	63.2723
3475.73	83.6055			1936.6	63.2808
3479.58	82.3903			1938.52	63.4461
3483.44	82.0683			1940.45	63.5274
3487.3	82.9235			1942.38	63.551
3491.16	83.5644			1944.31	63.5802
3495.01	83.4913			1946.24	63.6231
3498.87	82.41			1948.17	63.625
3502.73	81.2445			1950.1	63.662
3506.59	81.9213			1952.03	63.7627
3510.45	82.6699			1953.96	63.8133
3514.3	83.5798			1955.88	63.8245
3518.16	83.1479			1957.81	63.9344
3522.02	81.1268			1959.74	63.9296
3525.88	80.1108			1961.67	63.9024
3529.73	82.1462			1963.6	63.9495
3533.59	83.4366			1965.53	63.9751
3537.45	83.7535			1967.46	63.984
3541.31	82.7304			1969.39	63.9939
3545.16	82.8725			1971.32	63.9015
3549.02	82.8814			1973.24	63.9559
3552.88	82.7811			1975.17	63.9961
3556.74	83.4697			1977.1	64.0431
3560.59	82.6429			1979.03	64.1233
3564.45	82.6918			1980.96	64.1575
3568.31	82.6069			1982.89	64.2073
3572.17	82.491			1984.82	64.3425
3576.02	83.1098			1986.75	64.4363
3579.88	82.3297			1988.68	64.4807
3583.74	82.0974			1990.6	64.5227
3587.6	81.7043			1992.53	64.5424
3591.46	81.3982			1994.46	64.5516
3595.31	81.197			1996.39	64.5732
3599.17	81.0414			1998.32	64.6494
3603.03	81.1204			2000.25	64.6459
3606.89	81.0478			2002.18	64.6144
3610.74	81.0614			2004.11	64.5719
3614.6	81.2912			2006.04	64.615
3618.46	81.2947			2007.96	64.5998
3622.32	81.2316			2009.89	64.5025
3626.17	81.1993			2011.82	64.454
3630.03	81.1514			2013.75	64.5548
3633.89	81.3707			2015.68	64.6571
3637.75	80.9935			2017.61	64.3611
3641.6	81.5772			2019.54	64.251
3645.46	81.8185			2021.47	64.284
3649.32	82.0508			2023.4	64.2477
3653.18	82.3894			2025.32	64.2811
3657.04	82.7174			2027.25	64.3282
3660.89	82.6967			2029.18	64.3994
3664.75	82.949			2031.11	64.4729
3668.61	82.9677			2033.04	64.4852
3672.47	83.0505			2034.97	64.5594
3676.32	83.1462			2036.9	64.6319
3680.18	82.8736			2038.83	64.7999
3684.04	82.5295			2040.76	64.8077
3687.9	82.3148			2042.68	64.6977
3691.75	82.1459			2044.61	64.7633
3695.61	80.8916			2046.54	64.7498
3699.47	81.9864			2048.47	64.7403
3703.33	81.9363			2050.4	64.8099
3707.18	81.8965			2052.33	64.8783
3711.04	81.4841			2054.26	64.9044
3714.9	80.9206			2056.19	64.8835
3718.76	80.7947			2058.11	64.9254
3722.61	80.2597			2060.04	64.9647
3726.47	79.8435			2061.97	65.0207
3730.33	80.1536			2063.9	65.1027
3734.19	80.3158			2065.83	64.9832
3738.05	80.7013			2067.76	64.9689
3741.9	81.4042			2069.69	65.0691
3745.76	81.5578			2071.62	65.1769
3749.62	81.9643			2073.55	65.174
3753.48	82.685			2075.47	65.1999
3757.33	83.0418			2077.4	65.217
3761.19	83.395			2079.33	65.2723
3765.05	84.0964			2081.26	65.3839
3768.91	84.5434			2083.19	65.4553
3772.76	84.7011			2085.12	65.4738
3776.62	84.901			2087.05	65.556
3780.48	84.7921			2088.98	65.6428
3784.34	84.721			2090.91	65.5831
3788.19	83.6393			2092.83	65.5959
3792.05	84.8918			2094.76	65.7374
3795.91	84.9389			2096.69	65.8459
3799.77	85.0718			2098.62	65.8597
3803.63	85.2881			2100.55	65.8546
3807.48	85.1834			2102.48	65.867
3811.34	84.8591			2104.41	65.8812
3815.2	84.3999			2106.34	65.8815
3819.06	84.0187			2108.27	65.867
3822.91	83.8017			2110.19	65.9353
3826.77	83.2621			2112.12	66.0093
3830.63	82.5472			2114.05	66.0542
3834.49	82.0012			2115.98	66.0573
3838.34	81.8931			2117.91	66.154
3842.2	81.7077			2119.84	66.207
3846.06	80.1521			2121.77	66.2523
3849.92	81.6449			2123.7	66.2694
3853.77	81.531			2125.63	66.2715
3857.63	81.6289			2127.55	66.2914
3861.49	81.7946			2129.48	66.3296
3865.35	81.6039			2131.41	66.4087
3869.2	81.257			2133.34	66.4609
3873.06	81.2189			2135.27	66.4686
3876.92	81.3617			2137.2	66.4454
3880.78	81.3243			2139.13	66.4838
3884.64	81.2576			2141.06	66.4849
3888.49	81.144			2142.99	66.4515
3892.35	80.9412			2144.91	66.3541
3896.21	81.1179			2146.84	66.3421
3900.07	81.3718			2148.77	66.3541
3903.92	81.4341			2150.7	66.3342
3907.78	81.5311			2152.63	66.3486
3911.64	82.7231			2154.56	66.3894
3915.5	81.3705			2156.49	66.3936
3919.35	81.3515			2158.42	66.4138
3923.21	81.2482			2160.35	66.3947
3927.07	81.2611			2162.27	66.3263
3930.93	81.2456			2164.2	66.3847
3934.78	81.2891			2166.13	66.5021
3938.64	81.6692			2168.06	66.5177
3942.5	81.7396			2169.99	66.5127
3946.36	81.8119			2171.92	66.4982
3950.22	81.8573			2173.85	66.5065
3954.07	81.935			2175.78	66.5497
3957.93	81.8569			2177.71	66.5867
3961.79	81.8806			2179.63	66.6058
3965.65	82.4807			2181.56	66.5811
3969.5	82.504			2183.49	66.4981
3973.36	81.694			2185.42	66.4491
3977.22	81.8501			2187.35	66.391
3981.08	82.521			2189.28	66.3483
3984.93	82.7434			2191.21	66.3519
3988.79	82.026			2193.14	66.3441
3992.65	81.8119			2195.07	66.3357
3996.51	82.2755			2196.99	66.4004
4000.36	82.696			2198.92	66.4392
				2202.78	66.2442
				2204.71	66.2107
				2206.64	66.2528
				2208.57	66.2558
				2210.5	66.28
				2212.43	66.3267
				2214.35	66.3189
				2216.28	66.3887
				2218.21	66.4447
				2220.14	66.401
				2222.07	66.3696
				2224	66.3396
				2225.93	66.2955
				2227.86	66.2669
				2229.79	66.1703
				2231.71	66.1141
				2233.64	66.0694
				2235.57	66.0253
				2237.5	65.9824
				2239.43	65.8412
				2241.36	65.7261
				2243.29	65.6686
				2245.22	65.5285
				2247.15	65.4173
				2249.07	65.5165
				2251	65.4484
				2252.93	65.3895
				2254.86	65.3334
				2256.79	65.2664
				2258.72	65.205
				2260.65	65.1488
				2262.58	65.0713
				2264.51	64.997
				2266.43	64.9312
				2268.36	64.8676
				2270.29	64.8094
				2272.22	64.7487
				2274.15	64.681
				2276.08	64.595
				2278.01	64.4919
				2279.94	64.3832
				2281.87	64.2893
				2283.79	64.1899
				2285.72	64.0826
				2287.65	63.9748
				2289.58	63.8851
				2291.51	63.8113
				2293.44	63.751
				2295.37	63.6957
				2297.3	63.6621
				2299.22	63.6707
				2301.15	63.7356
				2303.08	63.856
				2305.01	64.0171
				2306.94	64.1948
				2308.87	64.3808
				2310.8	64.5677
				2312.73	64.7004
				2314.66	64.7839
				2316.58	64.8527
				2318.51	64.8994
				2320.44	64.9029
				2322.37	64.8702
				2324.3	64.7707
				2326.23	64.6398
				2328.16	64.4715
				2330.09	64.1909
				2332.02	63.8513
				2333.94	63.4823
				2335.87	63.1045
				2337.8	62.8643
				2339.73	62.7519
				2341.66	62.5977
				2343.59	62.4634
				2345.52	62.2724
				2347.45	62.0265
				2349.38	62.0362
				2351.3	62.149
				2353.23	62.1208
				2355.16	62.0973
				2357.09	62.0723
				2359.02	62.1311
				2360.95	62.2947
				2362.88	62.3863
				2364.81	62.4055
				2366.74	62.3633
				2368.66	62.2233
				2370.59	62.1214
				2372.52	62.0819
				2374.45	62.0449
				2376.38	61.9499
				2378.31	61.7918
				2380.24	61.5375
				2382.17	61.2713
				2384.1	61.0153
				2386.02	60.8837
				2387.95	60.8657
				2389.88	60.8589
				2391.81	60.7756
				2393.74	60.7594
				2395.67	60.7019
				2397.6	60.6098
				2399.53	60.5466
				2401.46	60.5346
				2403.38	60.4227
				2405.31	60.3039
				2407.24	60.1801
				2409.17	60.0284
				2411.1	59.9402
				2413.03	59.9597
				2414.96	59.9497
				2416.89	59.8801
				2418.82	59.753
				2420.74	59.6122
				2422.67	59.5129
				2424.6	59.4168
				2426.53	59.3463
				2428.46	59.253
				2430.39	59.1954
				2432.32	59.1572
				2434.25	59.066
				2436.18	58.9342
				2438.1	58.8365
				2440.03	58.851
				2441.96	58.7602
				2443.89	58.6135
				2445.82	58.51
				2447.75	58.445
				2449.68	58.4016
				2451.61	58.3556
				2453.54	58.2722
				2455.46	58.174
				2457.39	58.0788
				2459.32	57.9323
				2461.25	57.7405
				2463.18	57.6176
				2465.11	57.5302
				2467.04	57.4371
				2468.97	57.3368
				2470.9	57.183
				2472.82	57.0588
				2474.75	56.8661
				2476.68	56.6357
				2478.61	56.4838
				2480.54	56.3647
				2482.47	56.3054
				2484.4	56.2469
				2486.33	56.1891
				2488.26	56.1465
				2490.18	56.0889
				2492.11	56.0772
				2494.04	56.0713
				2495.97	56.1039
				2497.9	56.0763
				2499.83	56.0473
				2501.76	56.0311
				2503.69	55.9919
				2505.62	56.0299
				2507.54	56.072
				2509.47	56.0406
				2511.4	56.0083
				2513.33	55.9977
				2515.26	55.9823
				2517.19	55.9766
				2519.12	55.9902
				2521.05	55.9765
				2522.98	55.934
				2524.9	55.8849
				2526.83	55.8382
				2528.76	55.8459
				2530.69	55.845
				2532.62	55.8094
				2534.55	55.7783
				2536.48	55.7612
				2538.41	55.7538
				2540.33	55.7169
				2542.26	55.6664
				2544.19	55.6161
				2546.12	55.5171
				2548.05	55.4337
				2549.98	55.3142
				2551.91	55.2764
				2553.84	55.2663
				2555.77	55.2554
				2557.69	55.2981
				2559.62	55.2865
				2561.55	55.2675
				2563.48	55.2939
				2565.41	55.2565
				2567.34	55.2711
				2569.27	55.3494
				2571.2	55.313
				2573.13	55.2392
				2575.05	55.1304
				2576.98	55.1262
				2578.91	55.2183
				2580.84	55.2577
				2582.77	55.1731
				2584.7	55.122
				2586.63	55.0513
				2588.56	55.0172
				2590.49	55.0056
				2592.41	54.925
				2594.34	54.8987
				2596.27	54.924
				2598.2	54.9483
				2600.13	54.9387
				2602.06	54.8804
				2603.99	54.8324
				2605.92	54.7555
				2607.85	54.6929
				2609.77	54.7154
				2611.7	54.6528
				2613.63	54.5714
				2615.56	54.5788
				2617.49	54.5274
				2619.42	54.4095
				2621.35	54.4635
				2623.28	54.394
				2625.21	54.281
				2627.13	54.2812
				2629.06	54.2934
				2630.99	54.2352
				2632.92	54.1325
				2634.85	54.1192
				2636.78	54.1322
				2638.71	54.026
				2640.64	53.9273
				2642.57	53.9269
				2644.49	53.8959
				2646.42	53.8634
				2648.35	53.8229
				2650.28	53.7774
				2652.21	53.6488
				2654.14	53.6514
				2656.07	53.7161
				2658	53.6625
				2659.93	53.5106
				2661.85	53.3544
				2663.78	53.2824
				2665.71	53.214
				2667.64	53.1062
				2669.57	53.0087
				2671.5	52.9562
				2673.43	52.9756
				2675.36	52.9361
				2677.29	52.9578
				2679.21	52.9432
				2681.14	52.93
				2683.07	52.9166
				2685	52.8973
				2686.93	52.9567
				2688.86	53.0839
				2690.79	53.1983
				2692.72	53.1939
				2694.65	53.1851
				2696.57	53.2283
				2698.5	53.2268
				2700.43	53.1509
				2702.36	53.1323
				2704.29	53.1172
				2706.22	52.9949
				2708.15	52.9378
				2710.08	52.8678
				2712.01	52.7424
				2713.93	52.637
				2715.86	52.5226
				2717.79	52.467
				2719.72	52.4435
				2721.65	52.333
				2723.58	52.1802
				2725.51	51.9981
				2727.44	51.7849
				2729.37	51.5789
				2731.29	51.4166
				2733.22	51.3948
				2735.15	51.4175
				2737.08	51.3615
				2739.01	51.3064
				2740.94	51.3265
				2742.87	51.2948
				2744.8	51.2022
				2746.73	51.1735
				2748.65	51.1127
				2750.58	50.9523
				2752.51	50.8257
				2754.44	50.6758
				2756.37	50.5826
				2758.3	50.4958
				2760.23	50.363
				2762.16	50.2663
				2764.09	50.1713
				2766.01	50.153
				2767.94	50.0898
				2769.87	49.9705
				2771.8	49.7734
				2773.73	49.6218
				2775.66	49.407
				2777.59	49.1655
				2779.52	48.956
				2781.44	48.6859
				2783.37	48.4162
				2785.3	48.1032
				2787.23	47.8098
				2789.16	47.5125
				2791.09	47.1137
				2793.02	46.8015
				2794.95	46.5687
				2796.88	46.1386
				2798.8	45.6746
				2800.73	45.2342
				2802.66	44.7272
				2804.59	44.332
				2806.52	43.956
				2808.45	43.4863
				2810.38	42.8742
				2812.31	42.2781
				2814.24	41.7106
				2816.16	41.0957
				2818.09	40.4023
				2820.02	39.6566
				2821.95	38.718
				2823.88	37.5925
				2825.81	36.4996
				2827.74	35.2204
				2829.67	33.8102
				2831.6	32.3477
				2833.52	30.9709
				2835.45	29.3791
				2837.38	27.3289
				2839.31	24.6732
				2841.24	21.5652
				2843.17	18.0392
				2845.1	14.3421
				2847.03	10.842
				2848.96	7.97506
				2850.88	6.35342
				2852.81	6.22131
				2854.74	7.21943
				2856.67	8.77899
				2858.6	10.6997
				2860.53	12.8979
				2862.46	15.2226
				2864.39	17.3689
				2866.32	19.0297
				2868.24	20.0599
				2870.17	20.5385
				2872.1	20.8923
				2874.03	21.3351
				2875.96	22.0465
				2877.89	22.7878
				2879.82	23.1477
				2881.75	23.1735
				2883.68	22.8857
				2885.6	22.3343
				2887.53	21.5115
				2889.46	20.5251
				2891.39	19.4723
				2893.32	18.4844
				2895.25	17.4277
				2897.18	16.259
				2899.11	15.1613
				2901.04	14.1616
				2902.96	13.0678
				2904.89	11.8393
				2906.82	10.5429
				2908.75	9.19713
				2910.68	7.66853
				2912.61	5.94504
				2914.54	4.12722
				2916.47	2.42846
				2918.4	1.06413
				2920.32	0.25269
				2922.25	0
				2924.18	0.30002
				2926.11	1.01595
				2928.04	1.96645
				2929.97	2.97349
				2931.9	4.04489
				2933.83	5.30561
				2935.76	6.59095
				2937.68	8.17867
				2939.61	10.1125
				2941.54	12.1537
				2943.47	13.9058
				2945.4	15.2283
				2947.33	16.0657
				2949.26	16.3542
				2951.19	16.246
				2953.12	15.8162
				2955.04	15.4684
				2956.97	15.7532
				2958.9	16.8058
				2960.83	18.187
				2962.76	19.8497
				2964.69	21.9438
				2966.62	24.2222
				2968.55	26.6148
				2970.48	28.9491
				2972.4	31.0095
				2974.33	32.8214
				2976.26	34.4009
				2978.19	35.7829
				2980.12	36.9797
				2982.05	37.9127
				2983.98	38.5487
				2985.91	39.2065
				2987.84	39.6718
				2989.76	39.8626
				2991.69	39.6993
				2993.62	38.9988
				2995.55	37.9619
				2997.48	36.546
				2999.41	35.2325
				3001.34	34.2841
				3003.27	33.6129
				3005.2	33.3182
				3007.12	33.6416
				3009.05	34.4094
				3010.98	35.2969
				3012.91	36.3843
				3014.84	37.564
				3016.77	38.6641
				3018.7	39.8087
				3020.63	40.9069
				3022.55	41.8785
				3024.48	42.8562
				3026.41	43.8282
				3028.34	44.7705
				3030.27	45.4196
				3032.2	45.9259
				3034.13	46.4682
				3036.06	47.0181
				3037.99	47.6884
				3039.91	48.1454
				3041.84	48.4906
				3043.77	48.7943
				3045.7	49.1473
				3047.63	49.4783
				3049.56	49.7387
				3051.49	49.9848
				3053.42	50.1949
				3055.35	50.3415
				3057.27	50.5285
				3059.2	50.7713
				3061.13	51.1075
				3063.06	51.3027
				3064.99	51.2899
				3066.92	51.4396
				3068.85	51.633
				3070.78	51.7969
				3072.71	51.8256
				3074.63	51.9211
				3076.56	52.239
				3078.49	52.4151
				3080.42	52.5601
				3082.35	52.6438
				3084.28	52.5788
				3086.21	52.6375
				3088.14	52.8054
				3090.07	52.8595
				3091.99	52.7402
				3093.92	52.8943
				3095.85	52.9734
				3097.78	53.0656
				3099.71	53.2019
				3101.64	53.1097
				3103.57	53.0349
				3105.5	53.117
				3107.43	53.2126
				3109.35	53.1341
				3111.28	53.093
				3113.21	53.1969
				3115.14	53.1077
				3117.07	52.9933
				3119	53.041
				3120.93	53.1295
				3122.86	53.0571
				3124.79	53.074
				3126.71	53.0294
				3128.64	52.7996
				3130.57	52.7394
				3132.5	52.6941
				3134.43	52.6734
				3136.36	52.6397
				3138.29	52.6327
				3140.22	52.6708
				3142.15	52.522
				3144.07	52.3751
				3146	52.4475
				3147.93	52.2489
				3149.86	52.033
				3151.79	52.0928
				3153.72	52.0157
				3155.65	51.8529
				3157.58	51.8644
				3159.51	51.7921
				3161.43	51.7281
				3163.36	51.6189
				3165.29	51.487
				3167.22	50.9995
				3169.15	50.6086
				3171.08	50.7713
				3173.01	50.8333
				3174.94	50.6726
				3176.87	50.5998
				3178.79	50.4423
				3180.72	50.2238
				3182.65	50.1614
				3184.58	50.1895
				3186.51	49.9648
				3188.44	49.6871
				3190.37	49.6546
				3192.3	49.4515
				3194.23	49.25
				3196.15	49.2999
				3198.08	49.1941
				3200.01	48.9842
				3201.94	48.8902
				3203.87	48.8092
				3205.8	48.4385
				3207.73	48.1789
				3209.66	48.1015
				3211.59	48.2491
				3213.51	47.852
				3215.44	47.7254
				3217.37	48.1077
				3219.3	47.8411
				3221.23	47.534
				3223.16	47.4595
				3225.09	47.2525
				3227.02	47.1117
				3228.95	47.2147
				3230.87	47.4531
				3232.8	47.2361
				3234.73	46.8524
				3236.66	46.812
				3238.59	46.6968
				3240.52	46.3619
				3242.45	46.4215
				3244.38	46.4288
				3246.31	46.08
				3248.23	45.827
				3250.16	45.7207
				3252.09	45.6247
				3254.02	45.6106
				3255.95	45.4216
				3257.88	45.4128
				3259.81	45.4735
				3261.74	45.3714
				3263.66	45.1318
				3265.59	45.1482
				3267.52	45.3907
				3269.45	45.3288
				3271.38	44.9887
				3273.31	44.8067
				3275.24	44.5659
				3277.17	44.1796
				3279.1	44.2823
				3281.02	44.5057
				3282.95	44.3227
				3284.88	44.0904
				3286.81	44.1336
				3288.74	44.0832
				3290.67	43.9738
				3292.6	43.9438
				3294.53	43.8829
				3296.46	43.6212
				3298.38	43.4722
				3300.31	43.4156
				3302.24	43.3419
				3304.17	43.5644
				3306.1	43.8928
				3308.03	43.5415
				3309.96	43.0577
				3311.89	42.8658
				3313.82	42.6189
				3315.74	42.4566
				3317.67	42.4475
				3319.6	42.6292
				3321.53	42.9092
				3323.46	43.0803
				3325.39	42.9071
				3327.32	42.5058
				3329.25	42.4163
				3331.18	42.5093
				3333.1	42.7748
				3335.03	43.0108
				3336.96	42.9773
				3338.89	42.8358
				3340.82	42.8885
				3342.75	42.7451
				3344.68	42.4909
				3346.61	42.4207
				3348.54	42.7007
				3350.46	42.8632
				3352.39	42.6897
				3354.32	42.7027
				3356.25	42.9132
				3358.18	43.0465
				3360.11	43.1576
				3362.04	43.3788
				3363.97	43.6301
				3365.9	43.7073
				3367.82	43.6044
				3369.75	43.3924
				3371.68	43.1777
				3373.61	43.2966
				3375.54	43.384
				3377.47	43.585
				3379.4	43.8788
				3381.33	43.7363
				3383.26	43.804
				3385.18	43.7992
				3387.11	43.9888
				3389.04	44.5535
				3390.97	44.7572
				3392.9	44.5134
				3394.83	44.5335
				3396.76	44.5636
				3398.69	44.7234
				3400.62	45.1047
				3402.54	45.1662
				3404.47	45.1054
				3406.4	45.0976
				3408.33	45.1853
				3410.26	45.2966
				3412.19	45.4986
				3414.12	45.6007
				3416.05	45.6997
				3417.98	46.0295
				3419.9	45.8129
				3421.83	45.5421
				3423.76	45.7741
				3425.69	46.2108
				3427.62	46.4569
				3429.55	46.2706
				3431.48	46.2028
				3433.41	46.4655
				3435.34	46.4933
				3437.26	46.4888
				3439.19	46.4044
				3441.12	46.3507
				3443.05	46.7132
				3444.98	47.0964
				3446.91	46.6128
				3448.84	46.2976
				3450.77	46.7997
				3452.7	47.102
				3454.62	47.2376
				3456.55	47.7121
				3458.48	48.3631
				3460.41	48.4637
				3462.34	48.1327
				3464.27	48.3786
				3466.2	48.6208
				3468.13	48.4524
				3470.06	48.4497
				3471.98	48.6446
				3473.91	48.5699
				3475.84	48.5819
				3477.77	49.2973
				3479.7	49.6983
				3481.63	49.4569
				3483.56	49.6115
				3485.49	50.3587
				3487.42	50.4043
				3489.34	50.3781
				3491.27	50.6944
				3493.2	51.1613
				3495.13	51.3972
				3497.06	51.5259
				3498.99	52.1813
				3500.92	52.6166
				3502.85	51.5739
				3504.77	51.3333
				3506.7	52.5162
				3508.63	53.0636
				3510.56	53.0098
				3512.49	53.0365
				3514.42	53.2615
				3516.35	53.6855
				3518.28	53.8283
				3520.21	54.7848
				3522.13	55.7109
				3524.06	55.716
				3525.99	55.6478
				3527.92	55.0711
				3529.85	55.2675
				3531.78	55.8584
				3533.71	56.755
				3535.64	57.0825
				3537.57	56.8529
				3539.49	57.5646
				3541.42	58.8856
				3543.35	58.7617
				3545.28	58.6384
				3547.21	58.6653
				3549.14	59.1974
				3551.07	59.7443
				3553	58.9631
				3554.93	59.2123
				3556.85	60.2583
				3558.78	61.1378
				3560.71	61.5234
				3562.64	62.5467
				3564.57	62.829
				3566.5	62.1032
				3568.43	61.3751
				3570.36	61.3458
				3572.29	62.9702
				3574.21	63.4911
				3576.14	63.6333
				3578.07	63.8456
				3580	64.0486
				3581.93	64.9844
				3583.86	66.0927
				3585.79	65.8901
				3587.72	65.1912
				3589.65	64.9347
				3591.57	66.2364
				3593.5	66.5358
				3595.43	66.3839
				3597.36	66.6889
				3599.29	66.7777
				3601.22	66.945
				3603.15	67.537
				3605.08	68.1759
				3607.01	68.2611
				3608.93	68.1993
				3610.86	68.6193
				3612.79	68.9012
				3614.72	69.347
				3616.65	70.0807
				3618.58	69.5761
				3620.51	68.3079
				3622.44	68.8499
				3624.37	70.8868
				3626.29	71.883
				3628.22	70.2847
				3630.15	68.5701
				3632.08	69.7297
				3634.01	70.525
				3635.94	71.4164
				3637.87	72.0513
				3639.8	72.6037
				3641.73	73.1819
				3643.65	74.7377
				3645.58	77.4363
				3647.51	75.2593
				3649.44	71.4266
				3651.37	69.2433
				3653.3	73.2834
				3655.23	74.2247
				3657.16	71.8708
				3659.09	72.5856
				3661.01	73.0989
				3662.94	73.3353
				3664.87	74.1179
				3666.8	75.9196
				3668.73	74.6552
				3670.66	71.9409
				3672.59	74.0123
				3674.52	74.314
				3676.45	69.9994
				3678.37	70.3423
				3680.3	70.9196
				3682.23	72.2269
				3684.16	73.4352
				3686.09	75.0827
				3688.02	73.7086
				3689.95	71.175
				3691.88	70.1516
				3693.81	70.9182
				3695.73	71.515
				3697.66	71.983
				3699.59	73.0787
				3701.52	71.6696
				3703.45	70.8502
				3705.38	72.4497
				3707.31	73.3549
				3709.24	73.0872
				3711.17	72.5693
				3713.09	72.1423
				3715.02	72.7082
				3716.95	74.0307
				3718.88	73.6299
				3720.81	73.2073
				3722.74	72.7078
				3724.67	72.2937
				3726.6	71.399
				3728.53	71.9744
				3730.45	73.9468
				3732.38	73.7144
				3734.31	73.1859
				3736.24	71.7897
				3738.17	71.8949
				3740.1	73.6011
				3742.03	75.9056
				3743.96	74.316
				3745.88	72.9496
				3747.81	74.8026
				3749.74	74.0329
				3751.67	72.5886
				3753.6	72.5718
				3755.53	74.6252
				3757.46	74.8608
				3759.39	73.8352
				3761.32	73.5914
				3763.24	75.8547
				3765.17	75.0205
				3767.1	75.0834
				3769.03	74.9054
				3770.96	74.2775
				3772.89	74.2296
				3774.82	75.5312
				3776.75	75.9963
				3778.68	75.136
				3780.6	74.6903
				3782.53	75.3663
				3784.46	75.2828
				3786.39	74.8191
				3788.32	74.8516
				3790.25	75.1441
				3792.18	75.4526
				3794.11	76.5044
				3796.04	75.4742
				3797.96	75.4324
				3799.89	75.7024
				3801.82	73.9932
				3803.75	74.2847
				3805.68	75.4687
				3807.61	73.2498
				3809.54	74.3306
				3811.47	76.0673
				3813.4	77.7148
				3815.32	75.7101
				3817.25	74.8618
				3819.18	76.0951
				3821.11	74.0648
				3823.04	73.1671
				3824.97	75.1362
				3826.9	74.4752
				3828.83	75.08
				3830.76	75.7796
				3832.68	75.343
				3834.61	75.6318
				3836.54	75.4782
				3838.47	74.7835
				3840.4	73.5497
				3842.33	73.8544
				3844.26	73.7255
				3846.19	74.9718
				3848.12	77.029
				3850.04	79.1558
				3851.97	78.2947
				3853.9	71.3571
				3855.83	71.2891
				3857.76	73.7523
				3859.69	75.8768
				3861.62	76.731
				3863.55	75.7203
				3865.48	74.0761
				3867.4	76.2508
				3869.33	75.2039
				3871.26	74.5929
				3873.19	74.5622
				3875.12	73.0683
				3877.05	75.822
				3878.98	76.4403
				3880.91	74.4817
				3882.84	74.9781
				3884.76	74.766
				3886.69	73.0233
				3888.62	75.6007
				3890.55	75.4452
				3892.48	73.8145
				3894.41	74.129
				3896.34	76.2383
				3898.27	75.5006
				3900.2	74.5853
				3902.12	74.4421
				3904.05	73.7362
				3905.98	72.9437
				3907.91	73.059
				3909.84	74.0088
				3911.77	74.2031
				3913.7	75.1233
				3915.63	74.5112
				3917.56	73.8524
				3919.48	73.8628
				3921.41	73.981
				3923.34	73.9647
				3925.27	73.4827
				3927.2	73.528
				3929.13	73.6852
				3931.06	73.5033
				3932.99	73.2347
				3934.92	72.7716
				3936.84	73.09
				3938.77	73.5301
				3940.7	73.4648
				3942.63	73.1002
				3944.56	72.9988
				3946.49	73.1626
				3948.42	73.0818
				3950.35	72.9552
				3952.28	72.8437
				3954.2	72.7685
				3956.13	72.6763
				3958.06	72.6306
				3959.99	72.4621
				3961.92	72.2634
				3963.85	72.0275
				3965.78	72.2285
				3967.71	72.0172
				3969.64	71.8706
				3971.56	71.7432
				3973.49	71.6276
				3975.42	71.3968
				3977.35	71.3016
				3979.28	71.3336
				3981.21	71.202
				3983.14	71.1875
				3985.07	71.291
				3986.99	71.4209
				3988.92	71.5757
				3990.85	71.3009
				3992.78	71.2631
				3994.71	71.0829
				3996.64	71.1011
				3998.57	71.1913
				4000.5	70.9733

## Sheet: DLS
Before Irradiation					After Irradiation
Ratio	0.2	0.3	0.5		Ratio	0.2	0.3	0.5
Hydrodynamic diameter (nm)	Intensity				Hydrodynamic diameter (nm)	Intensity
0.34	0	0	0		0.34	0	0	0
0.38	0	0	0		0.38	0	0	0
0.43	0	0	0		0.43	0	0	0
0.49	0	0	0		0.49	0	0	0
0.55	0	0	0		0.55	0	0	0
0.62	0	0	0		0.62	0	0	0
0.7	0	0	0		0.7	0	0	0
0.8	0	0	0		0.8	0	0	0
0.9	0	0	0		0.9	0	0	0
1.02	0	0	0		1.02	0	0	0
1.15	0	0	0		1.15	0	0	0
1.3	0	0	0		1.3	0	0	0
1.47	0	0	0		1.47	0	0	0
1.66	0	0	0		1.66	0	0	0
1.87	0	0	0		1.87	0	0	0
2.11	0	0	0		2.11	0	0	0
2.39	0	0	0		2.39	0	0	0
2.7	0	0	0		2.7	0	0	0
3.05	0	0	0		3.05	0	0	0
3.45	0	0	0		3.45	0	0	0
3.89	0	0	0		3.89	0	0	0
4.4	0	0	0		4.4	0	0	0
4.97	0	0	0		4.97	0	0	0
5.61	0	0	0		5.61	0	0	0
6.34	0	0	0		6.34	0	0	0
7.17	0	0	0		7.17	0	0	0
8.1	0	0	0		8.1	0	0	0
9.15	0	0	0		9.15	0	0	0
10.34	0	0	0		10.34	0	0	0
11.68	0	0	0		11.68	0	0	0
13.2	0	0	0		13.2	0	0	0
14.91	0	0	0		14.91	0	0	0
16.84	0	0	0		16.84	0	0	0
19.03	0	0	0		19.03	0	0	0
21.5	0	0	0		21.5	0	0	0
24.29	0	0	0		24.29	0	0	0
27.45	0	0	0		27.45	0	0	0
31.01	0	0	0		31.01	0	0	0
35.03	0	0	0		35.03	0	0	0
39.58	0	0	0		39.58	0	0	0
44.72	0	0	0		44.72	0	0	0
50.53	0	0	0		50.53	0	0	0
57.09	0	0	0		57.09	0	0	0
64.5	0	0	0		64.5	0	0	0
72.87	0	0	0		72.87	0	0	0
82.33	0	0	0		82.33	0	0	0
93.02	0	0	0		93.02	0	0	0
105.1	0	0	0		105.1	0	0	0
118.74	0	0	0		118.74	0	0	0
134.16	0	0	0		134.16	0	0	0
151.57	0	0	0		151.57	0	0	0
171.25	0	0	0		171.25	0	0	0
193.48	0	0	0		193.48		0	0
218.6	0	0	0		218.6	0	0	0
246.98	0	0	0		246.98	0	0	0
279.04	0	0	0		279.04	0	0	0
315.27	0	0	0		315.27	0	0	0
356.2	0	0	0		356.2	0	0	0
402.44	0	0	0		402.44	0	0	0
454.69	0	0	0		454.69	0	0	0
513.71	0	0	0		513.71	0	0	0
580.41	1.033	0	0		580.41	0	0	0
655.76	2.231	0	0		655.76	0	0	0
740.89	3.012	0	0		740.89	0	0	0
837.07	5.231	1.434	1.324		837.07	0	0	0
945.74	7.223	4.324	4.23		945.74	1.234	0	0
1068.52	10.875	6.432	7.43		1068.52	3.464	0	0
1207.24	12.032	9.344	10.035		1207.24	4.345	2.436	0
1363.97	12.422	11.123	12.603		1363.97	6.345	4.657	1.213
1541.04	11.002	12.223	15.032		1541.04	7.232	6.345	3.435
1741.1	10.234	11.023	16.823		1741.1	10.234	8.679	5.34
1967.14	7.232	10.345	13.356		1967.14	8.293	10.345	10.234
2222.51	5.212	7.341	9.45		2222.51	7.456	7.975	15.354
2511.05	3.231	5.143	6.45		2511.05	6.54	4.568	11.435
2837.04	2.942	2.123	3.234		2837.04	4.435	2.245	7.674
3205.35	2.542	0.501	1.023		3205.35	3.356	0.12	5.745
3621.48	1.572	0	0		3621.48	1.214	0	3.977
4091.63	1.021	0	0		4091.63	0	0	2.223
4622.81	0.472	0	0		4622.81	0	0	1.324
5222.96	0	0	0		5222.96	0	0	0
5901.02	0	0	0		5901.02	0	0	0
6667.1	0	0	0		6667.1	0	0	0
7532.65	0	0	0		7532.65	0	0	0
8510.56	0	0	0		8510.56	0	0	0
9615.42	0	0	0		9615.42	0	0	0
10863.7	0	0	0		10863.7	0	0	0

## Sheet: Reversibility
Irradiation Time (min)	Irradiation	Average Diameter (nm)
0		1741
30	Visible	2221
60	UV	1723
90	Visible	2198
120	UV	1732
150	Visible	2178
180	UV	1747
210	Visible	2170
240	UV	1748

## Sheet:  SANS at different pH
pH 3				pH 7				pH 9
Q value	Intensity	Fitting	Error	Q value	Intensity	Fitting	Error	Q value	Intensity	Fitting	Error
0.01638	0.0406	0.0147	0.64446	0.01638	4.10772	3.634	0.02676	0.01638	9.70611	10.06	0.04698
0.01827	-0.00511	0.01442	0.71451	0.01827	3.25965	3.046	0.02515	0.01827	7.76207	8.044	0.04255
0.02016	0.02951	0.01379	0.63096	0.02016	2.71546	2.49	0.02308	0.02016	6.33887	6.426	0.03831
0.02204	0.00208	0.01331	0.62396	0.02204	2.12088	2.023	0.0214	0.02204	5.27084	5.181	0.03484
0.02393	0.00215	0.01253	0.63623	0.02393	1.8322	1.683	0.01977	0.02393	4.4409	4.356	0.03209
0.02582	-0.00714	0.01216	0.59032	0.02582	1.61192	1.444	0.0187	0.02582	3.78663	3.775	0.03012
0.02771	0.02956	0.01134	0.59306	0.02771	1.42757	1.327	0.01758	0.02771	3.2618	3.286	0.02798
0.0296	0.01905	0.01097	0.56676	0.0296	1.26716	1.156	0.01669	0.0296	2.83445	2.865	0.02632
0.03149	-0.00181	0.01065	0.52957	0.03149	1.1253	1.007	0.01593	0.03149	2.4819	2.494	0.02482
0.03338	-0.00597	0.01032	0.57424	0.03338	0.99937	0.925	0.01537	0.03338	2.18771	2.157	0.0233
0.03526	0.0061	0.0099	0.54908	0.03526	0.88846	0.8517	0.01469	0.03526	1.94093	1.873	0.02181
0.03715	-0.00444	0.00996	0.54173	0.03715	0.79031	0.7433	0.01425	0.03715	1.72982	1.638	0.0208
0.03904	0.00712	0.0097	0.56778	0.03904	0.70455	0.7074	0.01384	0.03904	1.54881	1.493	0.01991
0.04093	-0.00151	0.00942	0.58035	0.04093	0.63006	0.6372	0.01333	0.04093	1.39247	1.306	0.01885
0.04281	-0.00379	0.00936	0.61013	0.04281	0.56599	0.5831	0.01301	0.04281	1.25723	1.148	0.01798
0.0447	-0.00346	0.00918	0.53992	0.0447	0.51041	0.5322	0.0126	0.0447	1.13829	1.056	0.01737
0.04659	-0.00369	0.0093	0.53435	0.04659	0.46248	0.4856	0.01243	0.04659	1.03372	0.9555	0.01686
0.04848	-0.01788	0.00927	0.57101	0.04848	0.42103	0.4316	0.01218	0.04848	0.94131	0.8591	0.01635
0.05036	0.00639	0.00892	0.57648	0.05036	0.38518	0.4052	0.01162	0.05036	0.8597	0.7946	0.01561
0.05225	-0.00681	0.00913	0.60457	0.05225	0.35363	0.3743	0.01168	0.05225	0.78655	0.7125	0.0153
0.05413	-0.00835	0.00899	0.59355	0.05413	0.32595	0.3462	0.0114	0.05413	0.72143	0.6593	0.01486
0.05602	-0.0076	0.00891	0.52063	0.05602	0.30119	0.3205	0.01118	0.05602	0.66264	0.623	0.01456
0.0579	-0.00589	0.00879	0.61021	0.0579	0.27909	0.3084	0.011	0.0579	0.60994	0.5809	0.01418
0.05979	0.00282	0.00871	0.56769	0.05979	0.25903	0.305	0.01086	0.05979	0.56207	0.555	0.0139
0.06167	-0.01105	0.00902	0.54563	0.06167	0.24089	0.2586	0.0109	0.06167	0.51892	0.4712	0.0136
0.06356	0.00325	0.00887	0.50418	0.06356	0.22425	0.2499	0.01062	0.06356	0.47951	0.4715	0.01341
0.06544	0.0007002	0.00883	0.63532	0.06544	0.20907	0.2394	0.01054	0.06544	0.44381	0.4455	0.0132
0.06732	-0.00139	0.00869	0.56848	0.06732	0.19514	0.2383	0.01043	0.06732	0.41122	0.4116	0.01285
0.06921	-0.00716	0.00882	0.59108	0.06921	0.18225	0.198	0.01031	0.06921	0.38126	0.3525	0.01255
0.07109	-0.0035	0.00866	0.50462	0.07109	0.17045	0.1968	0.01014	0.07109	0.35396	0.3286	0.0122
0.07297	0.00926	0.00882	0.55226	0.07297	0.15958	0.1901	0.01015	0.07297	0.32889	0.3249	0.01222
0.07485	-0.00548	0.0089	0.57922	0.07485	0.14955	0.1645	0.01013	0.07485	0.30584	0.3031	0.0122
0.07673	0.00581	0.00859	0.60879	0.07673	0.14029	0.1676	0.00981	0.07673	0.28462	0.2927	0.01179
0.07862	0.00361	0.00878	0.55579	0.07862	0.13169	0.1595	0.00993	0.07862	0.26495	0.2732	0.01179
0.0805	-0.01274	0.0088	0.57894	0.0805	0.12377	0.1327	0.00988	0.0805	0.24689	0.2457	0.0117
0.08238	-0.01315	0.00867	0.6106	0.08238	0.11644	0.1237	0.0097	0.08238	0.23019	0.2275	0.01144
0.08426	-0.00653	0.00872	0.59684	0.08426	0.10963	0.1277	0.00973	0.08426	0.21475	0.2252	0.01141
0.08614	-0.00402	0.00868	0.57491	0.08614	0.1033	0.1069	0.00953	0.08614	0.20044	0.1959	0.01111
0.08801	0.00159	0.00848	0.55641	0.08801	0.09743	0.1284	0.00946	0.08801	0.18724	0.2118	0.01102
0.08989	-0.00878	0.00862	0.57804	0.08989	0.09192	0.1101	0.00953	0.08989	0.17493	0.1777	0.01092
0.09177	0.00404	0.00862	0.60613	0.09177	0.08677	0.09259	0.0093	0.09177	0.16349	0.1732	0.01078
0.09365	-0.00511	0.00857	0.58252	0.09365	0.08195	0.0971	0.00936	0.09365	0.15287	0.1623	0.01071
0.09552	-0.0006173	0.00852	0.58904	0.09552	0.07746	0.07234	0.0091	0.09552	0.14305	0.1551	0.01057
0.0974	0.00254	0.00836	0.60451	0.0974	0.07323	0.07953	0.00897	0.0974	0.13386	0.1451	0.01031
0.09928	-0.00437	0.00858	0.53623	0.09928	0.06925	0.07111	0.00916	0.09928	0.12531	0.1443	0.01054
0.1011	-0.01013	0.0085	0.52155	0.1011	0.06563	0.07063	0.00914	0.1011	0.1176	0.1247	0.01034
0.103	0.00724	0.00846	0.51835	0.103	0.06207	0.077	0.00902	0.103	0.11009	0.1322	0.01023
0.1049	-0.01101	0.00855	0.60632	0.1049	0.05873	0.0632	0.00913	0.1049	0.10311	0.1143	0.0103
0.1068	-0.00702	0.00852	0.55557	0.1068	0.05559	0.05496	0.00901	0.1068	0.09661	0.1098	0.01019
0.1086	-0.0017	0.00853	0.54315	0.1086	0.05278	0.05025	0.00894	0.1086	0.09086	0.1018	0.01008
0.1105	-0.00467	0.00837	0.59496	0.1105	0.04998	0.05034	0.00881	0.1105	0.0852	0.09437	0.00988
0.1124	-0.00226	0.00847	0.60105	0.1124	0.04734	0.05162	0.0089	0.1124	0.07994	0.09792	0.01
0.1143	-0.01637	0.0086	0.56618	0.1143	0.04486	0.03711	0.00902	0.1143	0.07503	0.07745	0.01004
0.1161	0.00397	0.0085	0.58406	0.1161	0.04263	0.0449	0.00882	0.1161	0.0707	0.08249	0.00982
0.118	-5.56e-05	0.00852	0.60557	0.118	0.04041	0.03323	0.00878	0.118	0.06643	0.08443	0.00989
0.1199	-0.00938	0.0084	0.52545	0.1199	0.03832	0.04369	0.00883	0.1199	0.06246	0.07564	0.00977
0.1217	-0.00719	0.00857	0.55862	0.1217	0.03644	0.03293	0.00888	0.1217	0.05896	0.07155	0.00987
0.1236	-0.00907	0.00846	0.61057	0.1236	0.03456	0.03745	0.00883	0.1236	0.05551	0.07505	0.00981
0.1255	0.00129	0.00858	0.60614	0.1255	0.03278	0.01704	0.0087	0.1255	0.0523	0.04654	0.00955
0.1273	-0.000615	0.00835	0.54241	0.1273	0.03119	0.02879	0.00859	0.1273	0.04947	0.05841	0.00946
0.1292	-0.00984	0.00855	0.4896	0.1292	0.02959	0.01497	0.00875	0.1292	0.0467	0.04852	0.00964
0.1311	0.00596	0.00839	0.58481	0.1311	0.02808	0.02935	0.00857	0.1311	0.04412	0.04988	0.00936
0.1329	0.00267	0.00844	0.62955	0.1329	0.02673	0.02176	0.00859	0.1329	0.04185	0.0438	0.00938
0.1348	-0.00139	0.00841	0.52933	0.1348	0.02537	0.02772	0.00865	0.1348	0.03962	0.04911	0.00945
0.1367	0.00815	0.00849	0.52248	0.1367	0.02408	0.02501	0.00862	0.1367	0.03756	0.04082	0.00933
0.1385	-0.00991	0.0085	0.56733	0.1385	0.02293	0.01657	0.00871	0.1385	0.03575	0.03191	0.00941
0.1404	0.00833	0.00834	0.51508	0.1404	0.02177	0.02519	0.00848	0.1404	0.03398	0.04611	0.00925
0.1423	-0.00309	0.00835	0.56405	0.1423	0.02067	0.0167	0.0085	0.1423	0.03234	0.04247	0.00933
0.1441	-0.01199	0.00858	0.51887	0.1441	0.01968	-0.00181	0.00866	0.1441	0.03091	0.0257	0.00946
0.146	-0.00885	0.00862	0.57726	0.146	0.01869	-0.00604	0.00864	0.146	0.02951	0.03738	0.00959
0.1478	-0.00585	0.00856	0.57539	0.1478	0.0178	0.00421	0.00864	0.1478	0.02829	0.02195	0.00934
0.1497	0.00606	0.00839	0.54798	0.1497	0.01691	0.02279	0.00853	0.1497	0.02711	0.03653	0.00921
0.1515	-0.00483	0.00843	0.56162	0.1515	0.01611	0.01024	0.00855	0.1515	0.02607	0.02584	0.00924
0.1534	0.00256	0.00846	0.58328	0.1534	0.01531	0.00717	0.00849	0.1534	0.02507	0.03033	0.00925
0.1552	-0.00335	0.00826	0.56606	0.1552	0.01459	0.01754	0.00843	0.1552	0.0242	0.02083	0.00901
0.1571	0.01099	0.00839	0.51163	0.1571	0.01386	0.02869	0.00853	0.1571	0.02337	0.03123	0.00911
0.159	-0.00481	0.00843	0.59842	0.159	0.01317	0.00342	0.0085	0.159	0.0226	0.01359	0.00912
0.1608	0.01353	0.00847	0.5666	0.1608	0.01256	0.01535	0.00848	0.1608	0.02195	0.03302	0.00919
0.1627	-0.00843	0.00846	0.53636	0.1627	0.01194	0.00581	0.00858	0.1627	0.02132	0.01569	0.00919
0.1645	-0.01439	0.00854	0.54628	0.1645	0.01138	-0.00559	0.00861	0.1645	0.02078	0.01591	0.00933
0.1664	0.00844	0.00821	0.54641	0.1664	0.01083	0.02127	0.00831	0.1664	0.02026	0.03379	0.00898
0.1682	0.00278	0.00844	0.55672	0.1682	0.01033	0.01352	0.00852	0.1682	0.01983	0.0194	0.00911
0.1701	-0.000489	0.00837	0.53205	0.1701	0.00983	0.01067	0.00845	0.1701	0.01941	0.02642	0.00914
0.1719	-0.00532	0.00855	0.55259	0.1719	0.00938	-0.00586	0.00854	0.1719	0.01906	0.00577	0.00916
0.1738	-0.00505	0.00834	0.5814	0.1738	0.00893	0.00416	0.00841	0.1738	0.01874	0.02216	0.00911
0.1756	-0.0086	0.00842	0.56083	0.1756	0.00852	0.00452	0.00852	0.1756	0.01846	0.01178	0.00911
0.1775	-0.0062	0.00839	0.48697	0.1775	0.00812	-0.00395	0.0084	0.1775	0.01821	0.00166	0.00895
0.1793	-0.0157	0.00843	0.55278	0.1793	0.00775	-0.00857	0.00848	0.1793	0.01801	-0.0008377	0.00906
0.1811	0.00773	0.00853	0.51067	0.1811	0.00741	-0.00145	0.00845	0.1811	0.01783	0.01157	0.00908
0.183	-0.00178	0.00845	0.54024	0.183	0.00706	-0.00202	0.00844	0.183	0.01767	0.01214	0.00908
0.1848	-0.00415	0.00835	0.58313	0.1848	0.00675	0.00409	0.00842	0.1848	0.01754	0.02192	0.00911
0.1867	-0.00565	0.00823	0.53558	0.1867	0.00645	0.00133	0.00828	0.1867	0.01743	0.00871	0.00886
0.1885	-0.0012	0.00841	0.50385	0.1885	0.00617	0.00204	0.00843	0.1885	0.01735	0.01447	0.00905
0.1903	0.00604	0.00836	0.51036	0.1903	0.00591	0.00425	0.00834	0.1903	0.01728	0.01764	0.00899
0.1922	-0.0054	0.00827	0.57424	0.1922	0.00565	0.00131	0.00833	0.1922	0.01723	0.00926	0.00891
0.194	-0.00411	0.00823	0.53779	0.194	0.00541	0.0086	0.00833	0.194	0.0172	0.01231	0.00887
0.1958	-0.01512	0.00839	0.54227	0.1958	0.00519	-0.01133	0.00841	0.1958	0.01718	-0.00806	0.00893
0.1977	0.00894	0.00822	0.57244	0.1977	0.00497	0.00283	0.00816	0.1977	0.01718	0.01097	0.00874
0.1995	0.01223	0.00836	0.54415	0.1995	0.00477	0.00166	0.00827	0.1995	0.01719	0.01237	0.00888
0.2013	-0.00746	0.00826	0.55962	0.2013	0.00459	-0.00283	0.0083	0.2013	0.0172	0.00847	0.0089
0.2032	-0.0044	0.00825	0.56505	0.2032	0.0044	0.00245	0.00831	0.2032	0.01723	0.0026	0.0088
0.205	0.00693	0.00824	0.59256	0.205	0.00424	0.00764	0.00824	0.205	0.01726	0.00592	0.00873
0.2068	-0.01422	0.00825	0.58118	0.2068	0.00408	-0.00486	0.00832	0.2068	0.01731	-0.00613	0.0088
0.2087	-0.00779	0.00841	0.49633	0.2087	0.00393	-0.01098	0.00838	0.2087	0.01735	-0.00414	0.00894
0.2105	-0.00888	0.00848	0.57914	0.2105	0.00379	-0.01108	0.00846	0.2105	0.01741	-0.00885	0.00897
0.2123	0.00275	0.00831	0.52669	0.2123	0.00366	0.00111	0.00829	0.2123	0.01746	-0.00444	0.00871
0.2141	0.00244	0.00818	0.57439	0.2141	0.00354	0.0033	0.00818	0.2141	0.01752	0.00339	0.00867
0.216	0.0037	0.00824	0.56559	0.216	0.00342	0.00708	0.00826	0.216	0.01759	0.01486	0.00884
0.2178	-0.00244	0.00839	0.42578	0.2178	0.00331	0.00233	0.00843	0.2178	0.01765	-0.00155	0.00887
0.2196	0.00305	0.00829	0.56079	0.2196	0.00321	-0.00751	0.0082	0.2196	0.01772	0.00651	0.00882
0.2214	-0.01477	0.0082	0.47727	0.2214	0.00312	-0.01001	0.00824	0.2214	0.01778	-0.00668	0.00876
0.2232	-0.0002057	0.00807	0.52061	0.2232	0.00303	0.0009317	0.00807	0.2232	0.01785	0.00983	0.00866
0.2251	-0.00174	0.00813	0.5379	0.2251	0.00295	0.00442	0.00817	0.2251	0.01792	0.00316	0.00865
0.2269	-0.00403	0.00821	0.50291	0.2269	0.00287	-0.00539	0.0082	0.2269	0.01799	0.01158	0.00886
0.2287	-0.00853	0.00824	0.46148	0.2287	0.0028	-0.0071	0.00825	0.2287	0.01805	-0.00989	0.00869
0.2305	0.00114	0.0081	0.52988	0.2305	0.00273	0.00327	0.00811	0.2305	0.01812	0.01233	0.0087
0.2323	-0.01865	0.00835	0.51762	0.2323	0.00267	-0.0193	0.00834	0.2323	0.01818	-0.00928	0.0089
0.2341	-0.00698	0.00826	0.51091	0.2341	0.00261	-0.00542	0.00827	0.2341	0.01824	0.00495	0.00886
0.2359	0.00817	0.00808	0.48693	0.2359	0.00256	0.00583	0.00805	0.2359	0.0183	0.02127	0.00871
0.2377	0.00225	0.00807	0.49194	0.2377	0.00251	0.00159	0.00806	0.2377	0.01835	0.00958	0.00862
0.2395	0.0008972	0.00817	0.53786	0.2395	0.00247	-0.00854	0.00809	0.2395	0.01841	-0.00153	0.00862
0.2414	-0.00356	0.00802	0.49231	0.2414	0.00242	0.00343	0.00808	0.2414	0.01846	0.01119	0.00866
0.2432	-0.00761	0.00816	0.57277	0.2432	0.00238	0.00635	0.00827	0.2432	0.01851	0.00103	0.00871
0.245	0.01273	0.00793	0.48945	0.245	0.00235	0.00441	0.00786	0.245	0.01855	0.02029	0.00851
0.2468	-0.00973	0.00803	0.5092	0.2468	0.00232	0.00689	0.00817	0.2468	0.01859	-0.00312	0.00854
0.2486	-0.00425	0.00829	0.48172	0.2486	0.00229	-0.01452	0.0082	0.2486	0.01863	-0.0091	0.00871
0.2504	0.00226	0.0081	0.48645	0.2504	0.00226	0.0008995	0.00809	0.2504	0.01867	-0.0001646	0.00855
0.2522	-0.01095	0.00819	0.4889	0.2522	0.00224	-0.01147	0.00818	0.2522	0.0187	0.00693	0.00885
0.254	0.00291	0.00792	0.51028	0.254	0.00221	0.00558	0.00793	0.254	0.01873	0.0096	0.00846
0.2558	-0.00391	0.008	0.52228	0.2558	0.00219	-0.00582	0.00798	0.2558	0.01875	-0.00912	0.0084
0.2576	-0.0038	0.00795	0.51773	0.2576	0.00217	-0.00404	0.00795	0.2576	0.01877	0.00317	0.00849
0.2594	-0.0085	0.00783	0.49187	0.2594	0.00216	-0.0009306	0.00789	0.2594	0.01879	0.00274	0.00839

## Sheet: UV
[C8EMorph][MO]
Wavelength (nm)	Absorbance
	Before Irradiation	After Irradiation
290	0.25429	0.23383
291	0.24831	0.23233
292	0.24211	0.23094
293	0.23541	0.2266
294	0.22876	0.22226
295	0.222	0.21936
296	0.21546	0.21902
297	0.2088	0.21853
298	0.20282	0.21792
299	0.19692	0.21702
300	0.19197	0.21647
301	0.18713	0.21447
302	0.18269	0.21347
303	0.17867	0.21068
304	0.17476	0.21005
305	0.17109	0.20923
306	0.16782	0.2078
307	0.16465	0.20923
308	0.16128	0.21103
309	0.15825	0.21222
310	0.15549	0.21357
311	0.15265	0.21312
312	0.15021	0.21357
313	0.14764	0.19652
314	0.14541	0.21357
315	0.14284	0.21213
316	0.13989	0.21357
317	0.13697	0.21441
318	0.13342	0.21502
319	0.12966	0.21687
320	0.12585	0.21936
321	0.12191	0.2237
322	0.11794	0.22434
323	0.11442	0.22515
324	0.11143	0.22632
325	0.10884	0.22804
326	0.10636	0.23239
327	0.10426	0.23528
328	0.10199	0.23743
329	0.09942	0.23962
330	0.09678	0.24387
331	0.09385	0.24686
332	0.09066	0.25272
333	0.08768	0.25409
334	0.08494	0.25721
335	0.08268	0.25843
336	0.08096	0.26133
337	0.07983	0.26567
338	0.07918	0.27001
339	0.07921	0.2729
340	0.07932	0.27391
341	0.08094	0.27724
342	0.08244	0.27829
343	0.08427	0.28014
344	0.08655	0.28029
345	0.08926	0.28303
346	0.0919	0.28428
347	0.09474	0.28593
348	0.09786	0.28641
349	0.10112	0.28737
350	0.10501	0.29171
351	0.10862	0.29171
352	0.11268	0.29461
353	0.1168	0.29529
354	0.12136	0.29605
355	0.12646	0.29712
356	0.13133	0.29825
357	0.13639	0.29899
358	0.14158	0.29915
359	0.14704	0.29945
360	0.15275	0.29415
361	0.15827	0.3004
362	0.16421	0.3011
363	0.16999	0.30329
364	0.1764	0.3028
365	0.1829	0.30184
366	0.18957	0.30201
367	0.1963	0.30282
368	0.20317	0.30329
369	0.21048	0.3033
370	0.21761	0.3033
371	0.22621	0.30333
372	0.23387	0.30332
373	0.24161	0.30331
374	0.24927	0.30522
375	0.25724	0.30618
376	0.26522	0.30689
377	0.27349	0.30763
378	0.28173	0.30662
379	0.29028	0.30633
380	0.29894	0.30618
381	0.30754	0.30502
382	0.31659	0.30329
383	0.3254	0.30229
384	0.33392	0.30175
385	0.34234	0.3004
386	0.35094	0.3004
387	0.36012	0.3004
388	0.36864	0.30047
389	0.3778	0.29751
390	0.38633	0.29703
391	0.39547	0.29687
392	0.40498	0.29605
393	0.41403	0.29171
394	0.42291	0.28992
395	0.43171	0.28882
396	0.44004	0.28593
397	0.44847	0.2842
398	0.4567	0.28303
399	0.4649	0.28221
400	0.47302	0.28158
401	0.48153	0.27869
402	0.4898	0.27823
403	0.49827	0.27782
404	0.50635	0.27724
405	0.5145	0.27552
406	0.52219	0.27435
407	0.53014	0.27131
408	0.53748	0.26856
409	0.54464	0.26701
410	0.55148	0.26583
411	0.55883	0.26422
412	0.56609	0.26133
413	0.57321	0.26101
414	0.58035	0.25993
415	0.58734	0.25908
416	0.59418	0.25843
417	0.6014	0.25687
418	0.60808	0.25554
419	0.61442	0.25423
420	0.62061	0.25409
421	0.62709	0.24975
422	0.63333	0.2483
423	0.63935	0.24691
424	0.64559	0.24541
425	0.65194	0.24389
426	0.65794	0.24252
427	0.66382	0.24323
428	0.67022	0.24396
429	0.67591	0.24312
430	0.68205	0.24386
431	0.68823	0.24389
432	0.69422	0.24312
433	0.69978	0.24252
434	0.70531	0.24354
435	0.71063	0.24396
436	0.71627	0.24396
437	0.72162	0.24286
438	0.72693	0.24192
439	0.73246	0.23962
440	0.73821	0.23962
441	0.7442	0.24101
442	0.74996	0.24104
443	0.75505	0.24107
444	0.75956	0.24188
445	0.76463	0.24252
446	0.76935	0.24372
447	0.7741	0.24541
448	0.77854	0.24612
449	0.78329	0.24689
450	0.78689	0.2483
451	0.79336	0.24901
452	0.79804	0.24975
453	0.80256	0.2527
454	0.80514	0.25554
455	0.80892	0.25554
456	0.81203	0.25554
457	0.81493	0.25554
458	0.81674	0.25554
459	0.81938	0.25554
460	0.8219	0.25554
461	0.82352	0.25554
462	0.82397	0.25554
463	0.8254	0.25554
464	0.82582	0.25554
465	0.82533	0.25554
466	0.82458	0.25554
467	0.82347	0.25554
468	0.82218	0.25988
469	0.82098	0.25901
470	0.81836	0.25843
471	0.81555	0.25839
472	0.81314	0.25898
473	0.80861	0.25843
474	0.80432	0.25722
475	0.8001	0.25699
476	0.79421	0.25698
477	0.78865	0.25697
478	0.78261	0.25679
479	0.77567	0.25609
480	0.76902	0.25554
481	0.76074	0.25502
482	0.7537	0.25264
483	0.74566	0.24975
484	0.73642	0.24811
485	0.72654	0.24732
486	0.71736	0.2483
487	0.70744	0.2469
488	0.69654	0.24541
489	0.68577	0.24541
490	0.67405	0.24396
491	0.66234	0.23817
492	0.65068	0.23817
493	0.63834	0.23383
494	0.62645	0.23383
495	0.6139	0.23094
496	0.6013	0.23094
497	0.58794	0.22804
498	0.57473	0.22804
499	0.56109	0.2237
500	0.54733	0.2237
501	0.53271	0.22081
502	0.51858	0.21792
503	0.50459	0.21357
504	0.49088	0.21357
505	0.47677	0.21213
506	0.46282	0.21213
507	0.44851	0.20991
508	0.43493	0.20779
509	0.42092	0.20055
510	0.40716	0.19766
511	0.393	0.19766
512	0.37901	0.19476
513	0.3647	0.19042
514	0.35119	0.18753
515	0.33769	0.18319
516	0.3249	0.1774
517	0.31215	0.17161
518	0.29929	0.16727
519	0.2873	0.16727
520	0.27516	0.16293
521	0.26322	0.15859
522	0.25143	0.15425
523	0.23966	0.14991
524	0.22853	0.14412
525	0.21743	0.14122
526	0.20699	0.13688
527	0.19715	0.13254
528	0.18671	0.12675
529	0.17775	0.12675
530	0.16846	0.12241
531	0.15965	0.11807
532	0.1509	0.11373
533	0.14271	0.10794
534	0.13498	0.10505
535	0.12734	0.10505
536	0.12002	0.09926
537	0.11285	0.09347
538	0.10601	0.08768
539	0.09995	0.08768
540	0.09369	0.08334
541	0.088	0.07755
542	0.08286	0.07321
543	0.07751	0.06743
544	0.07242	0.06453
545	0.06765	0.06019
546	0.06334	0.06019
547	0.05917	0.05874
548	0.05484	0.05585
549	0.05138	0.05151
550	0.04779	0.04572
551	0.04415	0.04138
552	0.04111	0.03848
553	0.0384	0.03848
554	0.03565	0.0327
555	0.033	0.0327
556	0.03083	0.02691
557	0.02854	0.02691
558	0.02645	0.02401
559	0.02437	0.02112
560	0.02267	0.02112
561	0.02083	0.01823
562	0.01951	0.01823
563	0.01789	0.01533
564	0.01683	0.01533
565	0.01579	0.01389
566	0.01467	0.01389
567	0.01358	0.01533
568	0.01224	0.01533
569	0.01171	0.01244
570	0.01095	0.01244
571	0.01007	0.01099
572	0.00918	0.01082
573	0.00882	0.00977
574	0.00846	0.00954
575	0.00771	0.00954
576	0.00726	0.0081
577	0.0069	0.00802
578	0.00654	0.00721
579	0.00603	0.00665
580	0.00591	0.00661
581	0.00543	0.00651
582	0.00537	0.00592
583	0.00543	0.00231
584	0.00481	0.00231
585	0.00484	0.00234
586	0.0045	0.00233
587	0.00431	0.00232
588	0.00448	0.00231
589	0.00404	0.00231
590	0.00392	0.00231
591	0.004	0.00233
592	0.00387	0.00231
593	0.00392	0.00231
594	0.00384	0.00233
595	0.00385	0.00232
596	0.00384	0.00231
597	0.00352	0.0023
598	0.00355	0.00233
599	0.00344	0.00231
600	0.00314	0.00231
601	0.00343	0.00232
602	0.00333	0.00231
603	0.00348	0.0023
604	0.00338	0.00232
605	0.00326	0.00231
606	0.00357	0.00233
607	0.00317	0.00231
608	0.00316	0.00233
609	0.00314	0.00231
610	0.00344	0.00232
611	0.00332	0.00233
612	0.00331	0.00232
613	0.00359	0.00231
614	0.00327	0.00233
615	0.00347	0.00232
616	0.00319	0.00233
617	0.00305	0.00231
618	0.0032	0.0031
619	0.00318	0.0052
620	0.00315	0.00571
621	0.00315	0.00612
622	0.00342	0.00665
623	0.00324	0.00665
624	0.00324	0.00376
625	0.00328	0.00376
626	0.00321	0.00382
627	0.00295	0.00665
628	0.00316	0.00665
629	0.00339	0.00665
630	0.00312	0.00665
631	0.0031	0.00376
632	0.00294	0.00376
633	0.00354	0.00376
634	0.00316	0.00371
635	0.00332	0.00376
636	0.00351	0.00376
637	0.00334	0.00373
638	0.00333	0.00376
639	0.00306	0.00376
640	0.00324	0.00377
641	0.00313	0.00372
642	0.00315	0.00376
643	0.00328	0.0037
644	0.00375	0.00376
645	0.00347	0.00376
646	0.00346	0.00376
647	0.00333	0.00376
648	0.00336	0.00376
649	0.00342	0.00376
650	0.00324	0.00371
651	0.00338	0.00376
652	0.0034	0.00376
653	0.00326	0.00373
654	0.0033	0.00376
655	0.00335	0.00376
656	0.00328	0.00377
657	0.00337	0.00372
658	0.00324	0.00376
659	0.00335	0.0037
660	0.00358	0.00376
661	0.00315	0.00376
662	0.00315	0.00372
663	0.00352	0.00376
664	0.00363	0.0037
665	0.00317	0.00376
666	0.00344	0.00376
667	0.00326	0.00377
668	0.0037	0.00371
669	0.00363	0.00376
670	0.00367	0.00376
671	0.00336	0.00373
672	0.00379	0.00376
673	0.0034	0.00376
674	0.00337	0.00377
675	0.00355	0.00372
676	0.00361	0.00376
677	0.00348	0.0037
678	0.0034	0.00376
679	0.0034	0.003763
680	0.00387	0.00376
681	0.00364	0.00376
682	0.00343	0.00376
683	0.00363	0.00371
684	0.00358	0.00376
685	0.00351	0.00376
686	0.00341	0.00373
687	0.00314	0.00376
688	0.00339	0.00376
689	0.00331	0.00376
690	0.00316	0.00371
691	0.00365	0.00376
692	0.00361	0.00376
693	0.0033	0.00373
694	0.00324	0.00376
695	0.00319	0.00376
696	0.00339	0.00377
697	0.00341	0.00372
698	0.00336	0.00376
699	0.00328	0.0037
700	0.00353	0.00376

## Sheet: Temperature (DLS)
	Temperature
Average Diameter (nm)	25 oC	35 oC	45 oC	55 oC
0.34	0	0	0	0
0.38	0	0	0	0
0.43	0	0	0	0
0.49	0	0	0	0
0.55	0	0	0	0
0.62	0	0	0	0
0.7	0	0	0	0
0.8	0	0	0	0
0.9	0	0	0	0
1.02	0	0	0	0
1.15	0	0	0	0
1.3	0	0	0	0
1.47	0	0	0	0
1.66	0	0	0	0
1.87	0	0	0	0
2.11	0	0	0	0
2.39	0	0	0	0
2.7	0	0	0	0
3.05	0	0	0	0
3.45	0	0	0	0
3.89	0	0	0	0
4.4	0	0	0	0
4.97	0	0	0	0
5.61	0	0	0	0
6.34	0	0	0	0
7.17	0	0	0	0
8.1	0	0	0	0
9.15	0	0	0	0
10.34	0	0	0	0
11.68	0	0	0	0
13.2	0	0	0	0
14.91	0	0	0	0
16.84	0	0	0	0
19.03	0	0	0	0
21.5	0	0	0	0
24.29	0	0	0	0
27.45	0	0	0	0
31.01	0	0	0	0
35.03	0	0	0	0
39.58	0	0	0	0
44.72	0	0	0	0
50.53	0	0	0	0
57.09	0	0	0	0
64.5	0	0	0	0
72.87	0	0	0	0
82.33	0	0	0	0
93.02	0	0	0	0
105.1	0	0	0	0
118.74	0	0	0	0
134.16	0	0	0	0
151.57	0	0	0	0
171.25	0	0	0	0
193.48	0	0	0	0
218.6	0	0	0	0
246.98	0	0	0	0
279.04	0	0	0	0
315.27	0	0	0	0
356.2	0	0	0	0
402.44	0	0	0	0
454.69	0	0	0	0
513.71	0	0	0	0
580.41	0	0	0	0
655.76	0	0	0	0.583
740.89	0	0	0	2.973
837.07	0	0	0	6.738
945.74	0	0	0	10.068
1068.52	0	2.206	0	12.209
1207.24	1.226	11.241	4.214	13.04
1363.97	14.872	19.801	10.16	12.728
1541.04	28.542	22.677	11.56	11.545
1741.1	30.074	19.623	9.34	9.788
1967.14	19.653	12.693	5.042	7.741
2222.51	5.633	4.97	0.784	5.651
2511.05	1.234	0.213	0	3.719
2837.04	0	0	0	2.099
3205.35	0	0	0	0.904
3621.48	0	0	0	0.215
4091.63	0	0	0	0
4622.81	0	0	0	0
5222.96	0	0	0	0
5901.02	0	0	0	0
6667.1	0	0	0	0
7532.65	0	0	0	0
8510.56	0	0	0	0
9615.42	0	0	0	0
10863.7	0	0	0	0

## Sheet: Temperature (UV)
Temp. (oC)	Absorbance
25	1.15
30	1.11
35	1.1
40	1.05
45	1.04
50	1.04
55	1.03

## Sheet: Turbidity
Ratio	Absorbance
0.01	0.25
0.05	0.73
0.1	1.23
0.15	1.51
0.2	1.49
0.25	1.54
0.3	1.65
0.35	1.56
0.4	1.6
0.45	1.62
0.5	1.92
0.55	2.5
0.6	2.87
0.6	2.9
0.6	3
0.6	3.1
0.6	3.1
0.6	3.2

## Sheet: Surface tension
Conc. (mM)	ST (mN/m)		Conc. (mM)	ST (mN/m)
0.15	63.6		1.6	42.4
0.3	60.3		2	39
0.45	58.2		2.4	38.4
0.6	56		2.8	36.2
0.75	54		3.2	34.4
0.9	52.7		3.6	32.8
1.05	50.9		4	30
1.2	49.6		4.4	28.7
1.35	47.1		4.8	25
1.5	44		5.2	24.6
1.65	42.8		5.6	22.4
1.8	43		6	20.7
1.95	42.9		6.4	18.4
2.1	43.1		6.8	18.65
			7.2	18.6
			7.6	18.5

[truncated: 2 more sheets: Zeta potential (pH), Dilution and Time(DLS)]
